1 **PRDM16 establishes lineage-specific transcriptional program to promote temporal**  
2 **progression of neural progenitors in the mouse neocortex**

3  
4 **Li He<sup>1, \*</sup>, Jennifer Jones<sup>2, \*</sup>, Weiguo He<sup>1,3</sup>, Bryan Bjork<sup>2§</sup>, Jiayu Wen<sup>4§</sup>, Qi Dai<sup>1§</sup>**

5  
6 1 Department of Molecular Bioscience, the Wenner-Gren Institute,  
7 Stockholm University

8  
9 2 Department of Biochemistry, College of Graduate Studies  
10 Midwestern University

11  
12 3 Department of Histology and Embryology, Hengyang Medical school, University of  
13 South China

14  
15 4 Department of Genome Sciences, The John Curtin School of Medical Research, The  
16 Australian National University

17  
18 \* Equal contribution

19 § Co-senior authors

20  
21 Lead Correspondence:

22 Tel: +46-8-164149

23 Email: [qi.dai@su.se](mailto:qi.dai@su.se)

24

25

26

27

28

29

30

31

32

33

34

35 **Abstract**

36

37 Radial glia (RG) in the neocortex sequentially generate distinct subtypes of projection neurons,  
38 accounting for the diversity and complex assembly of cortical neural circuits. Mechanisms that  
39 drive the rapid and precise temporal progression of RG are beginning to be elucidated. Here we  
40 reveal that the RG-specific transcriptional regulator PRDM16 promotes the transition of early  
41 to late phases of neurogenesis in the mouse neocortex. *Prdm16* mutant RG delays the timely  
42 progression of RG, leading to defective cortical laminar organization. We show that PRDM16  
43 regulates expression of neuronal specification genes and a subset of genes that are dynamically  
44 expressed between mid- and late-neurogenesis. Our genomic analysis suggests that PRDM16  
45 suppresses target gene expression through maintaining chromatin accessibility of permissive  
46 enhancers. Altogether, our results demonstrate a critical role of PRDM16 in establishing stage-  
47 specific gene expression program of RG during cortical neurogenesis. These findings also  
48 support a model where progenitor cells are primed with daughter cell gene expression program  
49 for rapid cell differentiation.

50

51

52

53

54

55

56

57

58

59

60

61

62

63

64

65

66

67

68

## 69 **Introduction**

70

71 Radial glia in the developing mammalian cerebral cortex are neural stem cells that give rise to  
72 all excitatory neurons (Anthony et al. 2004; Kriegstein and Alvarez-Buylla 2009). During peak  
73 phase of neurogenesis, RG divide asymmetrically to produce a self-renewing RG and a neuron  
74 or a transit-amplifying intermediate progenitor (IP) that divides again to produce more neurons  
75 (Noctor et al. 2004). On each embryonic (E) day starting at E11.5, RG generate a new laminar  
76 layer with distinct neuronal subtypes. Layer (L) 6 neurons are born first at E12.5, followed by  
77 L5 (E13.5), L4 (E14.5) and L2/3 (E15.5) neurons. The newborn neurons migrate along the  
78 radial fiber of their mother RG, passing through and positioning on top of earlier-born neurons  
79 (Angevine and Sidman 1961; Okano and Temple 2009; Kwan et al. 2012). Thus, the identity  
80 and laminar position of neuronal subtypes are tightly linked to their birthdate. During  
81 developmental progression, the competence of progenitors becomes progressively restricted  
82 (Frantz and McConnell 1996; Desai and McConnell 2000; Gaspard et al. 2008; Gao et al. 2014).  
83 Previous studies have suggested that both extrinsic and intrinsic mechanisms are needed to  
84 control temporal identity of neural progenitors (McConnell and Kaznowski 1991; Chenn and  
85 Walsh 2002; Fukumitsu et al. 2006; Ge et al. 2006; Shen et al. 2006; Hsu et al. 2015; Dennis et  
86 al. 2017; Zahr et al. 2018).

87 In differentiating neurons, cell-specific transcription factors and their regulated  
88 transcriptional cascades further guide neuronal specification, migration and circuit  
89 assembly (Greig et al. 2013). For example, complex interplay between the deep layer factor  
90 *Tbr1*, mid-layer *Fezf2* and upper-layer *Satb2* guide specification of corticothalamic,  
91 subcerebral and callosal neurons in deep-, mid- and upper- cortical layers (Srinivasan et al.  
92 2012; McKenna et al. 2015). Two related POU domain transcription factors, *Pou3f2* (*Brn2*) and  
93 *Pou3f3* (*Brn1*), are also required for determining the identity and migration of upper layer  
94 neurons (McEvelly et al. 2002; Sugitani et al. 2002). The proteins of these factors serve as  
95 subtype-specific markers (Molyneaux et al. 2007). Their mRNAs, as suggested by a few recent  
96 studies, exist in RG in much earlier stages (Yoon et al. 2017; Zahr et al. 2018). It is an  
97 interesting question whether the presence of the neuronal gene mRNAs in RG is important for  
98 RG neurogenesis.

99 The choroid plexus (ChP) protects the brain via the blood-CSF (cerebrospinal fluid)  
100 barrier and regulates CSF composition via specific and regulated transfer and  
101 secretion (Lehtinen et al. 2013; Johansson 2014). Signaling molecules in CSF (e.g. *Shh*, *Igf1*,  
102 *Wnt4*, *Tgm2* and *Fgf2*) are delivered to NSCs and directly influence NSC behavior (Imayoshi

103 et al. 2008; Lehtinen et al. 2011; Johansson et al. 2013; Johansson 2014). However, mechanisms  
104 and factors controlling development of the ChP are not fully understood.

105 The PR domain-containing (PRDM) family protein PRDM16 is a key transcriptional  
106 regulator in diverse cell types (Kajimura et al. 2008; Chuikov et al. 2010; Aguilo et al. 2011).  
107 In embryonic and adult brain, PRDM16 was shown to control neural stem cell  
108 maintenance (Chuikov et al. 2010; Shimada et al. 2017), IP proliferation (Baizabal et al. 2018),  
109 neuronal migration (Inoue et al. 2017; Baizabal et al. 2018) and ependymal cell differentiation  
110 (Shimada et al. 2017). It was shown that in these contexts PRDM16 regulates genes involved  
111 in reactive oxygen species (ROS) levels (Chuikov et al. 2010; Inoue et al. 2017) and epigenetic  
112 states of its bound enhancers (Baizabal et al. 2018). The PRDM16 protein (**Supplemental Fig.**  
113 **S1A**) contains a PR domain that possesses intrinsic Histone H3K4 (Zhou et al. 2016) and H3K9  
114 methyltransferase activity (Pinheiro et al. 2012), two potential DNA binding zinc-finger  
115 clusters (Nishikata et al. 2003) and interaction motifs for the co-repressors CtBP1/2. The  
116 transcriptional activity of PRDM16 is context-dependent (reviewed in (Chi and Cohen 2016)),  
117 as it activates gene expression when associated with other activators and represses gene  
118 expression when interacting with co-repressors.

119 In this study, we explored the *in vivo* function of *Prdm16* in the developing mouse brain.  
120 We show that *Prdm16* controls brain development in at least two areas, the ChP and the  
121 neocortex. *Prdm16* is essential for ChP development. In the neocortex, *Prdm16* promotes the  
122 shift between L5 neuron and L2-4 neuron specification. PRDM16 sets up the transcriptional  
123 landscape for mid-layer and upper-layer specification genes and influences gene expression  
124 dynamics of RG between mid- and late- neurogenesis. Together, our findings suggest that the  
125 gene expression program established by PRDM16 confers temporal identity of RG at the onset  
126 of early and late neurogenesis transition.

127

128

129

130

131

132

133

134

135

136

137 **Results**

138

139 ***Prdm16 is required for neocortical development and choroid plexus formation***

140 To assess the function of *Prdm16* in the developing brain, we made use of three  
141 multifunctional conditional gene trap (cGT) alleles (Strassman et al. 2017) (**Supplemental Fig.**  
142 **1B**). The *Prdm16*<sup>cGT</sup> (cGT) and *Prdm16*<sup>cGTreinv</sup> (cGTreinv) mouse strains produce a null allele  
143 (**Supplemental Fig.S1B**) and will be referred as *Prdm16* KO mutants. To examine PRDM16  
144 activity in the neocortex, we depleted *Prdm16* expression in the forebrain using the  
145 *Emx1*<sup>tm1(cre)Kry/J</sup> (*Emx1*<sup>IREScree</sup>) deleter strain (Gorski et al. 2002) and the conditional *Prdm16*<sup>cGTinv</sup>  
146 (cGTinv) strain. cGTinv will be referred to as *Prdm16* cKO throughout this manuscript. The  
147 *Prdm16* transcript is detectable in E9.5 brain (**Supplemental Fig.S1C** and (Horn et al. 2011)).  
148 At E13.5, PRDM16 has specific expression in the ChP and in the ventricular zone (VZ) where  
149 it co-localizes with the RG marker Sox2 (**Supplemental Fig.S1D**). In KO animals, PRDM16  
150 staining is lost in the entire brain (**Supplemental Fig. S1D**), while in cKO mutants it is depleted  
151 in the dorsal telencephalon but remains expressed in the ventral telencephalon and the ChP  
152 (**Supplemental Fig. S1E**).

153 We first analyzed the cortical laminar organization of the KO brains, by labeling cortical  
154 neurons with Satb2 for the upper-layer (L2-4, II-IV) and Ctip2 and Fezf2 for the mid-layer n  
155 (L5, V, strong Ctip2 and Fezf2) and the deep-layer (L6, VI, weak Ctip2 and Fezf2). At postnatal  
156 day 0 (P0), mutant cortices showed expansion of Ctip2+ layer, accompanied by thinning of  
157 Satb2+ upper-layer (**Fig. 1A-B**), compared with control cortices. Some Satb2+ neurons  
158 scattered inside the deep layer, suggesting that a subset of upper-layer neurons may have failed  
159 to migrate. Similarly at E15.5 when upper-layer neurons were just born, the number of Satb2+  
160 neurons was already reduced and the mid-layer neurons labeled with Fezf2 and Ctip2 were  
161 expanded in the mutant (**Fig. 1C-D**). The reciprocal changes of L5 and L2-4 marker genes were  
162 confirmed by reverse transcription followed by quantitative PCR (RT-qPCR). The levels of the  
163 two L5 genes increased to about 150%, while those of the L2-4 genes decreased to 50-70%  
164 (**Fig. 1E**), indicating that gain of mid-layer neurons roughly compensates for loss of upper-  
165 layer neurons at E15.5. Hence, the *Prdm16* KO cortex display two types of defects: over  
166 production of mid-layer neurons; compromised neuronal production and defective migration of  
167 upper layer neurons.

168 In *Prdm16* KO brains, the prospective ChP in the lateral and the 3<sup>rd</sup> ventricles are  
169 dramatically reduced (**Supplemental Fig. S1D, F, G**, (Bjork et al. 2010; Strassman et al.  
170 2017)), pointing to an essential role of PRDM16 in the ChP development. Together, the

171 phenotypic analyses in *Prdm16* KO mutant indicate that PRDM16 controls brain development  
172 in at least two brain areas, the neocortex and the ChP.

173

174 ***Expression of Prdm16 in the forebrain is responsible for the effects on laminar organization***

175 To test the direct roles of PRDM16 in cortical development, we analyzed *Emx1*<sup>IREScree-</sup>  
176 mediated *Prdm16* cKO mutants where *Prdm16* is depleted in the forebrain (**Supplemental Fig.**  
177 **S1E**). The *Prdm16* cKO animals survive to adulthood, allowing examination of postnatal  
178 stages. At E15.5, *Prdm16* cKO cortices displayed defects similar to *Prdm16* KO embryos,  
179 evidenced by the increase in number of Ctip2<sup>+</sup> and Fezf2<sup>+</sup> neurons and the reduction in number  
180 of Satb2<sup>+</sup> neurons (**Fig. 2A-B**). At P15, the cKO cortex showed similar defects on the upper-  
181 and mid-layer neurons (**Fig. 2C-E**). The Tbr1-labeled deep-layer is unchanged. Some Satb2<sup>+</sup>  
182 neurons failed to migrate to the upper-layer and were retained below the cortex, as a chunk of  
183 grey matter cells (Heterotopia) (**Fig. 2C-D**). Thus, the forebrain depletion of *Prdm16* led to the  
184 same effects on cortical laminar organization as the null KO did: reciprocal changes of L5 and  
185 L2-4 neurons and failure of upper-layer neuron migration. This result confirms that the laminar  
186 organization phenotypes in the mutant cortex are due to loss of *Prdm16* in the forebrain.

187

188 ***PRDM16 regulates the transition of mid-to-late neurogenesis***

189 We sought to understand the causes of *Prdm16* mutant phenotypes. Given that PRDM16  
190 is a RG-specific factor, PRDM16 may control neurogenesis through modulating intrinsic  
191 properties of RG. We reasoned that two possibilities could lead to increase of L5 neurons and  
192 decrease of L2-4 neurons. First, if loss of *Prdm16* delayed the transition of neurogenesis from  
193 E13.5 to E14.5, mutant RG would produce L5 neurons even after E13.5, which could result in  
194 fewer L2-4 neurons. Second, if loss of *Prdm16* increased proliferation of RG at E13.5 and  
195 reduced it at E14.5 and later, more daughter neurons could be produced at E13.5 and fewer  
196 produced at later time.

197 To test if PRDM16 controls the timing of RG transition, we traced RG daughter cell  
198 fate by injecting pregnant mice with BrdU at E14.5 and EdU at E15.5, and examined the  
199 distribution of BrdU and EdU cells and their cellular identity in the P5 cortex. Ctip2<sup>+</sup> L5  
200 neurons are born at E13.5 and should not be labeled with BrdU or EdU (Desai and McConnell  
201 2000; Gaspard et al. 2008). As expected, in the control cortex the Ctip2<sup>+</sup> cells were rarely  
202 labeled with BrdU or EdU (**Fig. 2F-G**). In contrast, the mutant cortex appeared supernumerary  
203 Ctip2<sup>+</sup>BrdU<sup>+</sup> neurons, suggesting Ctip2<sup>+</sup> neurons were produced even at or after E14.5 in the  
204 mutant. Notably, the numbers of the Ctip2<sup>+</sup>BrdU<sup>-</sup> cells did not differ between control and

205 mutant, indicating that production of Ctip2<sup>+</sup> neurons before E14.5 was normal in the mutant.  
206 These results demonstrate that some of *Prdm16* mutant RG cells failed to transit from E13.5 to  
207 E14.5 and continued to produce Ctip2<sup>+</sup> neurons at E14.5 (**Fig. 2H**).

208 BrdU<sup>+</sup> or EdU<sup>+</sup> cells were also found in the heterotopia and the deep layer  
209 (**Supplemental Fig. S2A-C**), confirming that the retained cells were the upper-layer neurons  
210 that failed to migrate but not from cell-fate transformation in the deep layer or heterotopia.  
211 None of the Ctip2<sup>+</sup>BrdU<sup>+</sup> cells were retained in the deep layer (**Fig. 2F**) or in the heterotopia  
212 (**Supplemental Fig. S2B**), suggesting that even the latter-produced Ctip2<sup>+</sup> neurons migrate  
213 normally and that the migration failure is specific to upper-layer neurons.

214

### 215 *PRDM16 promotes proliferation of intermediate progenitors during late neurogenesis*

216 To test if PRDM16 regulates proliferation, we examined RG and IP cell counts at E15.5  
217 by labeling RG with Pax6 and IPs with Tbr2. Remarkably, there was a reduction in the number  
218 of Tbr2<sup>+</sup> IPs in the cKO cortex, whereas Pax6<sup>+</sup> RG were not affected (**Fig. 3A-B**). We further  
219 assessed proliferation of IP cells by EdU labeling. We injected EdU to pregnant mice with  
220 embryos at E15 and analyzed the brains after 12 hours. There was a significant increase of the  
221 percentage of Edu<sup>+</sup>Ki67<sup>-</sup> cells over all Edu<sup>+</sup> cells, indicating more cells exiting cell cycle in  
222 mutant (**Fig. 3C-D**). We observed a significant decrease of Ki67<sup>+</sup> cells specifically in the  
223 mutant SVZ (**Fig. 3C, 3E**), suggesting decreased proliferation of IP cells. To confirm this, we  
224 injected animals with EdU at E15.5 and waited for 2 hours before harvesting. The fraction of  
225 Edu<sup>+</sup>Tbr2<sup>+</sup> cells over all Edu<sup>+</sup> cells is significantly less in mutant compared with control (**Fig.**  
226 **3F-G**), indicating that mutant cortex had fewer Tbr2<sup>+</sup> cells in S phase presumably due to fewer  
227 proliferative IPs.

228 We next examined cell counts and proliferation of RG and IP cells at E13.5. In contrast  
229 to E15.5, neither the Pax6<sup>+</sup> nor the Tbr2<sup>+</sup> cells showed change in cKO cortex (**Supplemental**  
230 **Fig. S3A-B**). Staining with PH3 confirmed no change in the number of mitotic cells  
231 (**Supplemental Fig. S3C-D**). To test cell cycle exit rate, we injected pregnant mice with EdU  
232 at E13 and analyzed the cortex at E13.5. There was no significant change in the fraction of  
233 Edu<sup>+</sup>Ki67<sup>-</sup> cells over all Edu<sup>+</sup> cells in cKO cortices (**Supplemental Fig. S3E-F**), indicating  
234 that cell exit did not occur earlier in the mutant at this stage. Another RG marker, Sox2, did not  
235 show any change (**Supplemental Fig. S3 F**).

236 Together, these findings suggest that PRDM16 regulates RG neurogenesis in a stage  
237 specific manner: first, it promotes the temporal transition of RG between E13.5 and E14.5;  
238 second, it promotes IP proliferation during late-neurogenesis.

239 ***PRDM16 modulates levels of neuronal specification genes in RG***

240 We hypothesized that PRDM16 may regulate the transcriptional program of RG. To this  
241 end, we generated RNA-seq data from E13.5 control and KO mutant forebrains (FB) (**Fig. 4A**).  
242 We identified 35 downregulated and 47 upregulated genes in KO versus control, using a cutoff  
243 of P value < 0.05 and fold-change > 1.5-fold (**Supplemental Fig. S4A-B**). We compared our  
244 FB RNA-seq data with the published RNA-seq data of sorted RG, IPs and cortical neurons  
245 (CNs) from E15.5 control and *Emx1*<sup>IREScree</sup>-mediated *Prdm16* cKO cortices (Baizabal et al.  
246 2018). Most of the de-regulated genes in the mutant FB were also de-regulated in the E15.5  
247 mutant RG (**Supplemental Fig. S4A**). Consistent with RG-specific expression of *Prdm16*, RG  
248 is the primary cell type where PRDM16 directly controls gene expression.

249 We next examined expression of layer marker genes in the RNA-seq data (**Fig. 4A**,  
250 (Molyneaux et al. 2007; Zahr et al. 2018)). Several upper-layer genes showed decreased  
251 expression in the E13.5 KO FB (**Fig. 4B**). Using a limma-based gene set testing (See Methods),  
252 we confirmed significant down-regulation of the upper-layer markers as a gene set ( $P_{\text{down-}}$   
253  $\text{regulation} = 0.0007$ ). Interestingly, given that the upper-layer neurons are not specified at E13.5,  
254 their expression changes likely occurred in progenitor cells.

255 Neither the mid-layer nor the deep-layer genes showed significant change as a group in  
256 the KO FB, despite the expression of three genes, *Pcp4*, *Otx1* and *Fezf2*, showing mild increase  
257 (**Fig. 4B**). We reasoned that at E13.5 the mid- and deep-layer neurons are specified and that  
258 many of the mid-layer genes are also expressed in the deep-layer, making it hard to reveal cell-  
259 type specific changes for these genes from whole FB data. To verify the changes, we selected  
260 *Pou3f2/Brn2* and *Unc5D*, two upper-layer genes, and *Pcp4* and *Fezf2*, two mid-layer markers  
261 for *in situ* hybridization experiments (**Fig. 4C-D**). Expression of *Brn2* and *Unc5D* was reduced  
262 in the mutant VZ and SVZ respectively, confirming the reduction of their expression in mutant  
263 progenitors. Expression of *Pcp4* and *Fezf2* showed an increase in the mutant VZ and SVZ,  
264 albeit the increase of *Fezf2* expression more obvious at E15.5. We also analyzed changes of the  
265 layer genes in the published E15.5 RG, IP and CN RNA-seq data (Baizabal et al. 2018) and  
266 observed a similar trend: the upper-layer genes are significantly downregulated in all three cell  
267 types (**Supplemental Fig. S4B**). The mid-layer genes as a group showed significant up-  
268 regulation in mutant RG and IPs, but not in mutant CN, suggesting these genes may be regulated  
269 in progenitors.

270 These results demonstrate that neuronal specification genes are already expressed in  
271 progenitors and that their normal expression is disrupted by *Prdm16* depletion.

272



273 ***PRDM16 mainly functions as a transcriptional repressor in RG***

274 To determine direct targets of PRDM16 in the developing brain and investigate how the  
275 targets are regulated, we performed chromatin immunoprecipitation followed by deep  
276 sequencing (ChIP-seq) from E13.5 heads. Using an IDR (Irreproducibility Discovery Rate)  
277 pipeline (see Methods), we identified 2319 confident peaks (IDR < 5%), of which 40% were  
278 mapped to intergenic regions, 30% to introns and only 20% close to promoters. This result  
279 indicates that PRDM16 mainly binds to distal enhancers (**Fig. 5A**). Gene Ontology analysis  
280 shows that PRDM16-bound genes are enriched for nervous system development, migration  
281 signaling and RG function (**Supplemental Fig. S5A-B**). We compared our E13.5 whole-head  
282 ChIP with the published E15.5 cortex ChIP data (Baizabal et al. 2018), and found around 30%  
283 (798) of the E13.5 peaks overlap with the E15.5 peaks (**Supplemental Fig. S5C**). The  
284 overlapping sites represent continuous binding by PRDM16 between E13.5 and E15.5.

285 We then analyzed how the targets are regulated by PRDM16. By applying gene set  
286 testing for all the targets as a set, we found that the targets in both E13.5 and E15.5 have a  
287 significant trend of de-repression in mutant RG ( $P < 0.001$ ) and IPs ( $P < 0.001$ ) but not in CNs  
288 ( $P = 0.19$ ) (**Fig. 5B**), suggesting that many targets are normally repressed by PRDM16. To  
289 confirm the finding from global analysis, we checked a group of genes called RG core identity  
290 genes (Yuzwa et al. 2017) highly expressed throughout neurogenesis. We found that 20 out of  
291 the 90 RG identity genes showed de-regulation in the *Prdm16* mutant FB. Only the subset  
292 bound by PRDM16 became upregulated in the mutant FB (**Fig. 5C**) or the mutant RG and IPs  
293 (**Supplemental Fig. S5D**).

294 We next examined chromatin states of E13.5 control and mutant cortices by using  
295 ATAC-seq (Assay for Transposase-Accessible Chromatin using sequencing) (Buenrostro et al.  
296 2013) that measures chromatin accessibility. Higher ATAC-seq signals in the genome correlate  
297 with active cis-regulatory elements (Daugherty et al. 2017). At PRDM16-bound regions, there  
298 is high ATAC-seq intensity that became even higher in the mutant (**Fig. 5D**), suggesting that  
299 loss of *Prdm16* led to increased chromatin accessibility at its targeted sites. We quantified  
300 changes of ATAC-seq coverage on the PRDM16 ChIP-seq peaks between control and mutant.  
301 226 and 189 peaks respectively showed increased and reduced coverage ( $FDR < 0.2$  and  $FC > 1.4$ -  
302 fold) (**Fig. 5E, Supplemental Fig. S5E**). We then examined expression changes for the genes  
303 whose loci associate with accessibility changes. Interestingly, many of the up-regulated genes  
304 in E15.5 mutant RG (**Fig. 5E**) or mutant E13.5 FB (**Supplemental Fig. S5E**) had increased  
305 chromatin accessibility, whereas down-regulated ones do not show either trend. Validation on  
306 one of the genes, *Veph1*, by RT-qPCR and *in situ* hybridization confirmed de-repression of

307 *Veph1* in *Prdm16* mutant (**Fig. 5F-H**). Hence, we conclude that PRDM16 primarily acts as a  
308 repressor in RG through maintaining accessibility of chromatin.

309

### 310 ***PRDM16 directly represses mid-layer genes including Fezf2***

311 Since PRDM16 represses transcription, as indicated above, expression of its targets in  
312 RG may be relatively low. We then asked in which cell types the target genes have higher  
313 expression. To address this, we first re-analyzed the published scRNA-seq data from E13.5  
314 (Yuzwa et al. 2017) to obtain cell-type specific transcriptomes. We identified 6 clusters and  
315 assigned the cell type to each cluster (**Supplemental Fig. S6 A-B**) based on the presence of  
316 known markers. Consistent with the previous finding (Zahr et al. 2018), the RG and the IP  
317 clusters express many layer marker genes (**Supplemental Fig. S6B**). We then plotted the  
318 percentage of cells that contain high summed expression (normalized value > 180, see Method)  
319 of PRDM16 targets per cell in each cluster (**Fig. 6A and Supplemental Fig. S6C**). The mid-  
320 and deep-layer neuron clusters show the highest, suggesting many of the PRDM16 targets are  
321 highly expressed in mid- and deep-layer neurons.

322 One of the PRDM16 targets is *Fezf2* (**Fig. 6B**), a mid-layer neuron determinant  
323 (Molyneaux et al. 2005). PRDM16 binds to the distal enhancers of *Fezf2*, one of which is known  
324 to drive *Fezf2* expression in RG (Shim et al. 2012). We confirmed *Fezf2* is de-repressed in  
325 *Prdm16* KO mutant neural stem cells, using primary NSC culture (**Fig. 6C**). We then tested  
326 responsiveness of this downstream RG enhancer to PRDM16 using a luciferase reporter driven  
327 by the *Fezf2* enhancer (**Fig. 6D**). PRDM16 fused with an VP64 activation domain induced  
328 higher expression of the *Fezf2* reporter compared to the pGL3-promoter alone, confirming  
329 PRDM16 binding to this enhancer. However, PRDM16 (PRDM16-FL) alone or the truncated  
330 version (PRDM16-PRdeletion, lack of the PR domain) did not have effect on the reporter (**Fig.**  
331 **6D**). We reasoned that PRDM16 may require chromatin context for its regulatory activity which  
332 is lacking in transient transfection assay. To overcome this, we measured the endogenous level  
333 of *Fezf2* mRNA by RT-qPCR from N2A cells infected with a control construct or with either  
334 PRDM16-FL or PRDM16-PRdeletion (**Fig. 6E**). Endogenous *Fezf2* expression was reduced in  
335 cells expressing PRDM16-FL but not in those expressing PRDM16-PRdeletion, suggesting that  
336 PRDM16 needs endogenous chromatin context or other cis-regulatory element(s) to repress  
337 *Fezf2* and the PR domain is essential for its repressive activity.

338

### 339 ***PRDM16 influences temporal dynamics of RG gene expression***

340 We hypothesized that the gene expression program of E13.5 RG may differ from that  
341 of E15.5 RG and that PRDM16 may influence the dynamics of gene expression in RG. To test  
342 this, we first identified dynamic genes in RG, by performing differential expression analysis  
343 between the E13.5 and the E15.5 RG clusters from the published scRNA-seq data (see Method).  
344 120 and 248 genes show higher expression at E13.5 and at E15.5 respectively (FDR < 0.2,  
345 FC>1.4-fold) (**Fig. 7A**). We then examined gene expression changes of these genes in *Prdm16*  
346 mutant RG (*Prdm16* cKO RNA-seq data (Baizabal et al. 2018)) and found 24 of them showing  
347 most significant changes (FDR < 0.05) (**Fig. 7B, Supplemental Fig. S7A**). All the up-regulated  
348 genes have PRDM16 binding, conforming the repressive activity of PRDM16. Among these  
349 genes, *Cdkn1c* encodes the cell cycle regulator p57<sup>KIP2</sup> that suppresses progenitor cell  
350 proliferation in early neurogenesis (Mairet-Coello et al. 2012). Normal expression of *Cdkn1c*  
351 in RG decreases 2-fold from E13.5 to E15.5, and it is more strongly expressed in IP than in RG  
352 (**Supplemental Fig. S7B**), suggesting alleviation from its inhibitory activity in later stage may  
353 be required for higher proliferation of IPs. Interestingly, *Cdkn1c* was up-regulated in *Prdm16*  
354 mutant RG and IP at E15.5 but not in mutant FB at E13.5 (**Fig. 7C**), which may account for  
355 reduced proliferation of mutant IPs at E15.5. Another gene *Flrt3* encodes fibronectin leucine  
356 rich transmembrane protein 3, a repulsive cue for the UNC5 family receptors in guiding cell  
357 migration (Yamagishi et al. 2011). Expression of *Flrt3* increased in *Prdm16* mutant (**Fig. 7D**).  
358 As UNC5D is specifically expressed in upper-layer neurons, the potential action between  
359 UNC5D and FLRT3 provides a possible mechanism specific for upper-layer neuron migration.  
360 These results demonstrate that PRDM16 regulates expression of a subset of temporally-  
361 dynamic genes which may mediate its roles in promoting temporal transition of RG.

362

363

364

365

366

367

368

369

370

371

372

373

## 374 **Discussion**

375

376 Our results demonstrate that PRDM16 is a critical transcriptional regulator that controls the  
377 gene expression program of RG during cortical neurogenesis. Regulation by PRDM16 is  
378 required for the timed progression of RG between early and late phases of neurogenesis.  
379 PRDM16 executes the temporal shift by establishing the stage-specific gene expression  
380 program including neuronal specification genes, cell cycle regulators and genes for upper-layer  
381 neuron migration.

382 Recently Baizabal *et al* reported that PRDM16 regulates upper-layer neuron production  
383 and migration but does not affect deep- or mid-layer neuron fate (Baizabal et al. 2018).  
384 However, we found that there is prolonged production of mid-layer neurons in *Prdm16* cKO  
385 cortex in addition to its effects on upper-layer neurons. The discrepancy may result from the  
386 methods used to assess cell fates. We distinguished L5 mid-layer neurons from L6 deep-layer  
387 neurons while they assessed L5 and L6 neurons as a whole population. We dissected the  
388 regulatory network controlled by PRDM16 at the transition of mid- to late-neurogenesis and  
389 identified different classes of genes responsible for PRDM16 functions. We propose a model  
390 that includes three key points (**Fig. 7E**): 1) PRDM16 represses mid-layer determinants to allow  
391 timely upregulation of upper-layer genes in RG; 2) PRDM16 represses cell cycle inhibitors to  
392 allow higher proliferation of IPs at later neurogenesis; 3) PRDM16 controls genes encoding  
393 guidance cues needed for upper-layer neuronal migration.

394

### 395 ***PRDM16 and the temporal identity of RG***

396 The understanding of temporal control of RG has been augmented over the years. A  
397 number of transcription factors and epigenetic regulators have been shown to control the timing  
398 of cortical neuronal specification (McConnell and Kaznowski 1991; Chenn and Walsh 2002;  
399 Fukumitsu et al. 2006; Ge et al. 2006; Shen et al. 2006; Hsu et al. 2015; Dennis et al. 2017).  
400 Progressive hyperpolarization of the membrane of RG regulates the sequential generation of  
401 neuronal subtypes through modulating Wnt signalling (Vitali et al. 2018). Moreover, it was  
402 recently revealed that RG are primed with a spectrum of neuronal genes. Post-transcriptional  
403 mechanisms, including translational repression (Zahr et al. 2018) and the N6-methyladenosine  
404 (m6A) RNA modification (Yoon et al. 2017), regulate RG progression through preventing  
405 precocious production of neuronal proteins in RG. Some questions still remain. For example,  
406 how is the priming status of RG established? How does the pre-established transcriptional  
407 program impact daughter cell fate? We found that *Prdm16* mutant RG show disrupted

408 expression of mid- and upper-layer genes and several temporally-dynamic genes involved in  
409 proliferation (*Id2*, *Cdkn1c*) and migration (*Flrt3*, *Dcx*, *Sparcl1*). These results suggest that  
410 PRDM16 may be involved in setting up the primed gene expression program of RG. PRDM16  
411 is expressed throughout cortical neurogenesis. A question is how its activity is triggered at the  
412 onset of mid- to late- neurogenesis transition. Interestingly, *Prdm16* co-clusters with *Slc1a3*, a  
413 regulator of metabolism of glutamate and ion flux (Vandenberg and Ryan 2013). It will be of  
414 interest to test a potential function of SLC1A3 in integrating extrinsic and intrinsic signals.

415 Notably, Hamlet, the ortholog of PRDM16 controls the temporal identity of  
416 intermediate progenitors in *Drosophila* neuroblast lineage (Eroglu et al. 2014), suggesting that  
417 the role of the PRDM16 proteins are evolutionarily conserved.

418

### 419 ***Transcriptional activity of PRDM16 in cortical development***

420 PRDM16 can act as a repressor or an activator depending on its associated partners (Chi  
421 and Cohen 2016). We showed that PRDM16-bound genes have a trend of de-repression in  
422 *Prdm16* mutant, indicating its repressive role in the neocortex. The fact that many of the  
423 PRDM16 targets are expressed in RG suggest that repression by PRDM16 is not to fully silence  
424 genes but to maintain gene expression at the right level. In support of this, PRDM16 binding  
425 associates with open chromatin. Moreover, we do not rule out the possibility of PRDM16 being  
426 an activator, as our ChIP and RNA-seq data identified a small subset of genes that show  
427 PRDM16 binding and down-regulation in mutant.

428 The PR domain of PRDM16 is essential in repressing *Fezf2*. Baizabal *et al* showed that  
429 PRDM16 without the PR domain failed to rescue target gene de-repression (Baizabal et al.  
430 2018). The PR domain of PRDM16 was shown to be essential in suppressing MLLr1 leukemia  
431 via intrinsic H3K4 methylation activity (Zhou et al. 2016). We did not observe global changes  
432 of H3K4me1 or H3K4me2 levels in mutant cortex by immunostaining (data not shown). In  
433 agreement with this result, Baizabal *et al* did not detect significant change of H3K4 methylation  
434 levels using ChIP-seq (Baizabal et al. 2018). Future studies are needed to address the  
435 mechanistic nature of how the PR domain or any other domain contributes to the function of  
436 PRDM16 in the neocortex.

437 *Prdm16* is among the many genes deleted in human 1p36 microdeletion syndrome, a  
438 disorder that displays a wide variety of disease conditions. According to the previous identified  
439 function of PRDM16 in normal development, loss of *Prdm16* might contribute to several  
440 problems including the craniofacial and cardiac defects and hydrocephalus of the syndrome  
441 (Bjork et al. 2010; Arndt et al. 2013; Shimada et al. 2017). Our findings, along with the study

442 by Baizabel *et al*, defined a mechanism by which *Prdm16* loss of function in the formation of  
443 Heterotopia, a neurodevelopmental disorder that leads to severe mental retardation and seizures  
444 that were also seen in the 1p36 syndrome. More mechanistic insights of PRDM16 function will  
445 increase our understanding of its developmental roles in cell fate specification and its  
446 pathological role in diseases.

447

448

449

450

451

452

453

454

455

456

457

458

459

460

461

462

463

464

465

466

467

468

469

470

471

472

473

474

475

## 476 **Materials and methods**

477

### 478 ***Animals and processing***

479 All animal procedures were approved by Swedish agriculture board (Jordbruks Verket)  
480 with document number Dnr 11553-2017 and the MWU Institutional Animal Care and Use  
481 Committee. The *Prdm16*<sup>cGT</sup> and *Prdm16*<sup>cGTreinv</sup> mice (Strassman et al. 2017) were maintained  
482 by outcrossing with the FVB/NJ line. *B6.129S2-Emx1tm1(cre)Krl/J (Emx1<sup>IREScree</sup>)* (Gorski et al.  
483 2002) were used to generate conditional gene trap knockout animals as described previously  
484 (Strassman et al. 2017).

485

### 486 ***Molecular cloning***

487 The pCAGIG plasmid (Addgene) was inserted with a fragment encoding a nuclear  
488 localization signal (NLS) and 3xFlag in the EcoRI site. To make pCAGIG-Prdm16-FL or  
489 pCAGIG-Prdm16-PRdeletion, the full-length open reading frame (ORF) or the truncation that  
490 lacks coding sequence for amino acid 2 to amino acid 180 of *Prdm16* was PCR amplified from  
491 MSCV-Prdm16 (Addgene 15504) and inserted between the EcoRI and XhoI sites in pCAGIG-  
492 NLS-Flag. The VP64 fragment was then inserted to the XhoI site of pCAGIG-Prdm16 to make  
493 pCAGIG-FL-VP64.

494 The plasmids used for making stable cell lines, pCDH-Prdm16 and pCDH-Prdm16-  
495 PRdeletion, were generated as follow: The Prdm16 FL ORF, the PR-deletion coding sequences  
496 or the NLS-3xFlag was digested from their pCAGIG plasmids and inserted sequentially to the  
497 pCDH-CMV-MCS-EF1-Puro plasmid (System Biosciences) between the EcoRI and NotI sites  
498 (for Prdm16-FL and Prdm16-PRdeletion) and the XbaI and EcoRI sites (for NLS-3xFLAG).

499

### 500 ***Immunohistochemistry, BrdU and EdU labelling and confocal imaging***

501 At designed stages, embryos or pulps were perfused with PBS followed by 4%  
502 paraformaldehyde. The perfused brains were dissected, fixed overnight and sectioned coronally  
503 using a vibratome (Leica Microsystems). Immunostaining was done according to standard  
504 protocols as previously used (Dai et al. 2013a). The list of primary secondary antibodies and  
505 using condition is provided in supplemental table 4.

506 BrdU (5-bromo-2'-deoxyuridine) and EdU (5-ethynyl-2'-deoxyuridine) (5-20 µg/g of  
507 body weight) were injected into the peritoneal cavity of pregnant mice. BrdU incorporation was  
508 measured by immunostaining using an antibody against rat-BrdU (Abcam) and mouse-BrdU  
509 (DSHB). EdU incorporation was detected with the Click-iT assay (Invitrogen) according to the

510 manufacturer's instructions. Imaging was done on Zeiss confocal microscope. ZEN  
511 (ZeissLSM800), ImageJ (NIH) and Photoshop (Adobe) were used for analysis and  
512 quantification.

513

#### 514 ***In situ hybridization***

515 The mouse brains at defined ages were dissected and fixed for 12 hours in 4% PFA,  
516 cryoprotected in 25% sucrose overnight, embedded in O.C.T, and sectioned at 18  $\mu\text{m}$  on Leica  
517 cryostatsCM3050s. RNA *in situ* hybridization was performed using digoxigenin-labeled  
518 riboprobes as described previously. Detailed protocols are available upon request. Images were  
519 taken using a Leica DMLB microscope.

520

#### 521 ***Quantification and statistical analysis***

522 Cell numbers were manually counted in ImageJ/Fiji cell counter (National Institute of  
523 Health, USA). Number of marker positive cells in the control and KO mutant at P0 were  
524 determined by counting the average number of positive cells in three 80  $\mu\text{m}$  width columns.  
525 Number of marker positive cells in the control and KO or cKO mutants at E15.5 were  
526 determined by counting number of positive cells in 100  $\mu\text{m}$  width column from layer IV to VI.  
527 Numbers of cells in the control and cKO cortex at P15 were determined by counting the number  
528 of positive cells in one 250 $\mu\text{m}$  width column within the whole cortex in two different areas  
529 (medial and dorsal lateral). For proliferation analysis at E15.5, numbers of Pax6+, Tbr2+,  
530 EdU+, Ki67+ cells were determined by counting the total number of positive cells in two 100  
531  $\mu\text{m}$  width columns in both VZ and SVZ. For proliferation analysis at E13.5, numbers of Pax6+,  
532 Tbr2+, EdU+, Ki67+ cells were determined by counting the total number in 300  $\mu\text{m}$  width  
533 cortex. The production of daughter neurons was reflected by the cell cycle exit through  
534 measuring the ratio of EdU+Ki67-cells in total EdU+ cells. Numbers of BrdU+Ctip2+ or BrdU-  
535 Ctip2+ cells at P5 were determined by counting number of positive cells in 300  $\mu\text{m}$  width  
536 column in layer II to layer V. All data are presented as mean  $\pm$  SD, and statistical significance  
537 was determined using two-tailed unpaired Student's t test.

538

#### 539 ***Neural stem cell culture and RT-qPCR***

540 Control and mutant embryonic cortices were dissected and dissociated into single cell  
541 suspension and digested with Acutase (Sigma). Cells were maintained in proliferation media  
542 (STEMCELL Technologies). 3 control or 3 *Prdm16* mutant neural stem cell cultures were  
543 grown for two days before RNA extraction by use of TRIzol reagent (Invitrogen). 4  $\mu\text{g}$  of total



544 RNA was further cleaned with Turbo DNase (Ambion) and used in reverse-transcription with  
545 RT master mix (ThermoFisher). To ensure the absence of genomic DNA, control qPCR was  
546 performed on a mock-reverse-transcribed RNA sample. Primer sequences are listed in  
547 Supplemental Table 4.

548

#### 549 ***Cell culture and Luciferase assays***

550 The neuroblastoma cell line Neuro-2A (N2A) cells were cultured in 50% of DMEM  
551 (GIBCO) containing 10% fetal calf serum and 50% of optimen serum reduced medium. For  
552 luciferase assays, transfections were performed in 96-well plate using FugeneHD transfection  
553 reagent (Promega). The following DNA combinations were used: 20ng of *Fezf2* luciferase  
554 reporter or the pGL3 promoter vector, 100ng of pCAGIG-Prdm16, pCAGIG-  
555 Prdm16PRdeletion, pCAGIG-Prdm16-VP64, pCAGIG-VP64 or pCAGIG. 2ng of Renilla-  
556 luciferase construct was used as internal control. After 24-hour incubation, transfected cells  
557 were lysed and luciferase activity was measured using Dual Luciferase Assays (Promega), and  
558 promoter activity was defined as the ratio between the firefly and *Renilla* luciferase activities.

559 For generating the cell lines that stably express control, Prdm16-FL or Prdm16-  
560 PRdeletion, lentiviral particles were first produced in 293T cells and then added to N2A cells  
561 for infection. The cells that stably express the corresponding constructs were selected and  
562 maintained in medium that contains puromycin. Two individual stable lines were generated for  
563 each of the constructs used in RT-qPCR analysis of the *Fezf2* gene.

564

#### 565 **ChIP-seq analysis**

566 In each replicate, three E13.5 control or Prdm16 KO mutant heads were pooled, fixed  
567 and lysed. ChIP was performed as previously described (Dai et al. 2013b). DNA libraries were  
568 made using the NEBNext Ultra™ II DNA Library Prep Kit and sequenced on the Illumina  
569 HiSeq2500 platform.

570 The replicated *Prdm16* KO (x3) and control (x3) ChIP-seq samples, after the adaptor  
571 trimming by Trimmomatic, were mapped to the UCSC *Mus musculus* (mm10) genome  
572 assembly using Bowtie2 with the default parameters. The uniquely mapped reads (with  
573 mapping quality  $\geq 20$ ) were used for further analysis. The PRDM16 peaks were called by  
574 HOMER (v4.10) (Heinz et al. 2010). The peak replicate reproducibility was estimated by  
575 Irreproducibility Discovery Rate (IDR), using the HOMER IDR pipeline  
576 (<https://github.com/karmel/homer-idr>). As suggested by the Encode IDR guideline that IDR  
577 requires to initially call peaks permissively for the replicates, we used a relatively relaxed

578 parameter “-F 2 -fdr 0.3 -P .1 -L 3 -LP .1” for the true/pseudo/pooled replicates by the HOMER  
579 peak calling. The final confident peaks were determined by an IDR < 5%. The peaks that were  
580 overlapped with mm10 blacklist were also removed. For comparisons, we re-analyzed the  
581 *Prdm16* control and cKO ChIP-seq public data ((Baizabal et al. 2018); GSE111657) using the  
582 same HOMER IDR pipeline.

583

#### 584 ***RNA-seq differential expression analysis***

585 Cortices of control and *Prdm16* KO mutant E13.5 embryos were dissected for RNA  
586 extraction using Trizol reagent (Invitrogen). RNA quality of three biological replicates was  
587 tested by Agilent Bioanalyzer. RNA-seq libraries were made using the Illumina Truseq Total  
588 RNA library Prep Kit LT. Sequencing was performed on the Illumina HiSeq2500 platform.

589 After trimming the adaptor sequences using Trimmomatic, we mapped RNA-seq reads  
590 from the replicated *Prdm16* wild type (x3) and mutant samples (x3) to the UCSC *Mus musculus*  
591 (mm10) genome assembly using HISAT2. We normalized RNA-seq by the “Relative Log  
592 Expression” method implemented in the DESeq2 Bioconductor library (Love et al. 2014). Gene  
593 annotation was obtained from the iGenomes UCSC *Mus musculus* gene annotation.  
594 Differentially expressed mRNAs between *Prdm16* mutants versus wild type were identified,  
595 and FDR (Benjamini-Hochberg) was estimated, using DESeq2. For comparisons, we re-  
596 analyzed the differential expression of *Prdm16* WT and cKO RNA-seq public data (Baizabal  
597 et al. 2018; GSE111660) using the same method as above. The genes with P-value  $\leq 0.05$  were  
598 considered to be differentially expressed.

599

#### 600 ***ATAC-seq analysis***

601 The ATAC-seq libraries were made according to the published method (Buenrostro et  
602 al. 2013) and using the Illumina Nextera DNA library kit. In brief, cortices were dissected from  
603 3 control and 3 *Prdm16* KO E13.5 brains. Tn5 enzyme reaction was performed at 37 degrees  
604 for 30mins, followed by DNA purification. 11 cycles of PCR amplification was performed  
605 using barcoded adaptors and primers on purified DNA template. Libraries were purified and  
606 pooled before sequencing with illumina Next-seq platform. The replicated *Prdm16* KO (x3)  
607 and control (x3) ATAC-seq samples, after the adaptor trimming by Trimmomatic, were mapped  
608 to the UCSC *Mus musculus* (mm10) genome assembly using Bowtie2 with the default  
609 parameters. The high quality and uniquely mapped reads (with mapping quality  $\geq 20$ ) were  
610 used for further analysis. ATAC-seq differential expression analysis between *Prdm16* mutants  
611 and wild types on the *Prdm16* bound ChIP-seq peaks were performed by Limma R package.

612 The ATAC-seq peak calling was performed by HOMER using the “broad peak” option with  
613 parameters “-region -size 1000 -minDist 2500”, separately for the mutant and wild type. To  
614 compare active enhancers between E13.5 and E15.5, we further re-analyzed the publicly  
615 available histone mark H3K27ac Prdm16 ChIP-seq data at E15.5. We called the peaks against  
616 Input using “narrow peak” option by HOMER with the default parameters.

617

### 618 ***Gene set enrichment testing***

619 To test whether a set of genes are significantly changed amongst the differentially  
620 expressed (DE) genes from *Prdm16* wild type and mutant RNA-seq data, we used gene set  
621 testing function “camera” and “mroast” in the R limma package (Ritchie et al. 2015). We used  
622 “camera”, a ranking based gene set test accounting for inter-gene correlation, to test whether  
623 the layer markers are significantly changed as a set. We used “mroast” (number of rotations =  
624 1000), a self-contained gene set test, to test whether the majority of the genes amongst PRDM16  
625 targets are significantly up- or down-regulated. We also used “mroast to test which Gene  
626 Ontology (GO) terms and Reactome pathways are significantly up- or down-regulated in  
627 *Prdm16* mutant versus wild type.

628

### 629 ***scRNA-seq analysis.***

630 To gain insights into cell types of the *Prdm16* targets, we reanalyzed the murine cortical time-  
631 series scRNA-seq data (Yuzwa et al. 2017). We employed the Bioconductor scRNA-seq  
632 analysis workflow for droplet-based protocols (Lun et al. 2016). (i) The cortical cells (the cells  
633 expressing *Emx*) were selected for the analysis. The low quality cells were first removed if they  
634 are 3 MAD (the median absolute deviation) lower than the median library size OR if they are 3  
635 MAD lower the median gene expression OR if they are 4 MAD higher than the median  
636 mitochondrial reads. (ii) We used the deconvolution approach, a method to handle high zeros  
637 in scRNA-seq, to compute size factors for cells for normalization. (iii) The cells were  
638 constructed into graphs by constructing a shared nearest neighbor graph (SNN) and clustered  
639 by Walktrap algorithm. (iv) We manually assigned cell types to the identified clusters in each  
640 stage using the known neuron and layer markers.

641 To identify differentially expressed genes between E13.5 and E15.5, RG cells were  
642 extracted from E13.5 and E15.5 RG clusters and differential expression analysis was performed  
643 using edgeRQLF R package. The genes with FDR  $\leq 0.2$  and FC  $> 1.4$ -fold were considered  
644 to be significantly differentially expressed between E13.5 and E15.5.

645

646 **Acknowledgements**

647 We thank the animal experimental core facility (ECF) and the imaging facility (IFSU) of  
648 Stockholm University and the National Genomic Institute of Scilife Laboratories, Sweden, for  
649 providing service and support. W.H was supported by the visiting scientist fellowship from  
650 China Scholarship Council. J.W. was supported by the Australian Research Council (ARC)  
651 Future Fellowship (FT60100143). The project was supported by the Young Investigator grant  
652 from Swedish Research Council (Vetenskapsrådet, 2014-5584) and the research grant from  
653 Swedish Cancer funding agency (CAN 2017/529) to Q.D.

654

655 **Author contributions**

656 Q.D. conceived and designed the project. L.H. performed most of the experiments, with help  
657 from J.J, B.B and W.H. J.W performed all the computational analysis. Q.D., J.W. and L.H.  
658 analysed and interpreted the data. Q.D. wrote the manuscript with input from the other authors.

659

660

661

662

663

664

665

666

667

668

669

670

671

672

673

674

675

676

677

678

679

680 **Reference**

681

- 682 Aguilo F, Avagyan S, Labar A, Sevilla A, Lee DF, Kumar P, Lemischka IR, Zhou BY,  
683 Snoeck HW. 2011. Prdm16 is a physiologic regulator of hematopoietic stem cells. *Blood* **117**:  
684 5057-5066.
- 685 Angevine JB, Jr., Sidman RL. 1961. Autoradiographic study of cell migration during  
686 histogenesis of cerebral cortex in the mouse. *Nature* **192**: 766-768.
- 687 Anthony TE, Klein C, Fishell G, Heintz N. 2004. Radial glia serve as neuronal progenitors in  
688 all regions of the central nervous system. *Neuron* **41**: 881-890.
- 689 Arndt AK, Schafer S, Drenckhahn JD, Sabeh MK, Plovie ER, Caliebe A, Klopocki E, Musso  
690 G, Werdich AA, Kalwa H et al. 2013. Fine mapping of the 1p36 deletion syndrome identifies  
691 mutation of PRDM16 as a cause of cardiomyopathy. *Am J Hum Genet* **93**: 67-77.
- 692 Baizabal JM, Mistry M, Garcia MT, Gomez N, Olukoya O, Tran D, Johnson MB, Walsh CA,  
693 Harwell CC. 2018. The Epigenetic State of PRDM16-Regulated Enhancers in Radial Glia  
694 Controls Cortical Neuron Position. *Neuron* **98**: 945-962 e948.
- 695 Bjork BC, Turbe-Doan A, Prysak M, Herron BJ, Beier DR. 2010. Prdm16 is required for  
696 normal palatogenesis in mice. *Hum Mol Genet* **19**: 774-789.
- 697 Buenrostro JD, Giresi PG, Zaba LC, Chang HY, Greenleaf WJ. 2013. Transposition of native  
698 chromatin for fast and sensitive epigenomic profiling of open chromatin, DNA-binding  
699 proteins and nucleosome position. *Nat Methods* **10**: 1213-1218.
- 700 Chenn A, Walsh CA. 2002. Regulation of cerebral cortical size by control of cell cycle exit in  
701 neural precursors. *Science* **297**: 365-369.
- 702 Chi J, Cohen P. 2016. The Multifaceted Roles of PRDM16: Adipose Biology and Beyond.  
703 *Trends Endocrinol Metab* **27**: 11-23.
- 704 Chuikov S, Levi BP, Smith ML, Morrison SJ. 2010. Prdm16 promotes stem cell maintenance  
705 in multiple tissues, partly by regulating oxidative stress. *Nat Cell Biol* **12**: 999-1006.
- 706 Dai Q, Andreu-Agullo C, Insolera R, Wong LC, Shi SH, Lai EC. 2013a. BEND6 is a nuclear  
707 antagonist of Notch signaling during self-renewal of neural stem cells. *Development* **140**:  
708 1892-1902.
- 709 Dai Q, Ren A, Westholm JO, Serganov AA, Patel DJ, Lai EC. 2013b. The BEN domain is a  
710 novel sequence-specific DNA-binding domain conserved in neural transcriptional repressors.  
711 *Genes Dev* **27**: 602-614.
- 712 Daugherty AC, Yeo RW, Buenrostro JD, Greenleaf WJ, Kundaje A, Brunet A. 2017.  
713 Chromatin accessibility dynamics reveal novel functional enhancers in *C. elegans*. *Genome*  
714 *research* **27**: 2096-2107.
- 715 Dennis DJ, Wilkinson G, Li S, Dixit R, Adnani L, Balakrishnan A, Han S, Kovach C,  
716 Gruenig N, Kurrasch DM et al. 2017. Neurog2 and Ascl1 together regulate a postmitotic  
717 derepression circuit to govern laminar fate specification in the murine neocortex. *Proc Natl*  
718 *Acad Sci U S A* **114**: E4934-E4943.
- 719 Desai AR, McConnell SK. 2000. Progressive restriction in fate potential by neural progenitors  
720 during cerebral cortical development. *Development* **127**: 2863-2872.
- 721 Eroglu E, Burkard TR, Jiang Y, Saini N, Homem CC, Reichert H, Knoblich JA. 2014.  
722 SWI/SNF complex prevents lineage reversion and induces temporal patterning in neural stem  
723 cells. *Cell* **156**: 1259-1273.
- 724 Frantz GD, McConnell SK. 1996. Restriction of late cerebral cortical progenitors to an upper-  
725 layer fate. *Neuron* **17**: 55-61.
- 726 Fukumitsu H, Ohtsuka M, Murai R, Nakamura H, Itoh K, Furukawa S. 2006. Brain-derived  
727 neurotrophic factor participates in determination of neuronal laminar fate in the developing  
728 mouse cerebral cortex. *J Neurosci* **26**: 13218-13230.

- 729 Gao P, Postiglione MP, Krieger TG, Hernandez L, Wang C, Han Z, Streicher C, Papusheva E,  
730 Insolera R, Chugh K et al. 2014. Deterministic progenitor behavior and unitary production of  
731 neurons in the neocortex. *Cell* **159**: 775-788.
- 732 Gaspard N, Bouschet T, Hourez R, Dimidschstein J, Naeije G, van den Aemele J, Espuny-  
733 Camacho I, Herpoel A, Passante L, Schiffmann SN et al. 2008. An intrinsic mechanism of  
734 corticogenesis from embryonic stem cells. *Nature* **455**: 351-357.
- 735 Ge W, He F, Kim KJ, Blanchi B, Coskun V, Nguyen L, Wu X, Zhao J, Heng JI, Martinowich  
736 K et al. 2006. Coupling of cell migration with neurogenesis by proneural bHLH factors. *Proc*  
737 *Natl Acad Sci U S A* **103**: 1319-1324.
- 738 Gorski JA, Talley T, Qiu M, Puelles L, Rubenstein JL, Jones KR. 2002. Cortical excitatory  
739 neurons and glia, but not GABAergic neurons, are produced in the Emx1-expressing lineage.  
740 *J Neurosci* **22**: 6309-6314.
- 741 Greig LC, Woodworth MB, Galazo MJ, Padmanabhan H, Macklis JD. 2013. Molecular logic  
742 of neocortical projection neuron specification, development and diversity. *Nat Rev Neurosci*  
743 **14**: 755-769.
- 744 Heinz S, Benner C, Spann N, Bertolino E, Lin YC, Laslo P, Cheng JX, Murre C, Singh H,  
745 Glass CK. 2010. Simple combinations of lineage-determining transcription factors prime cis-  
746 regulatory elements required for macrophage and B cell identities. *Mol Cell* **38**: 576-589.
- 747 Horn KH, Warner DR, Pisano M, Greene RM. 2011. PRDM16 expression in the developing  
748 mouse embryo. *Acta Histochem* **113**: 150-155.
- 749 Hsu LC, Nam S, Cui Y, Chang CP, Wang CF, Kuo HC, Touboul JD, Chou SJ. 2015. Lhx2  
750 regulates the timing of beta-catenin-dependent cortical neurogenesis. *Proc Natl Acad Sci U S*  
751 *A* **112**: 12199-12204.
- 752 Imayoshi I, Shimogori T, Ohtsuka T, Kageyama R. 2008. Hes genes and neurogenin regulate  
753 non-neural versus neural fate specification in the dorsal telencephalic midline. *Development*  
754 **135**: 2531-2541.
- 755 Inoue M, Iwai R, Tabata H, Konno D, Komabayashi-Suzuki M, Watanabe C, Iwanari H,  
756 Mochizuki Y, Hamakubo T, Matsuzaki F et al. 2017. Prdm16 is crucial for progression of the  
757 multipolar phase during neural differentiation of the developing neocortex. *Development* **144**:  
758 385-399.
- 759 Johansson PA. 2014. The choroid plexuses and their impact on developmental neurogenesis.  
760 *Front Neurosci* **8**: 340.
- 761 Johansson PA, Irmeler M, Acampora D, Beckers J, Simeone A, Gotz M. 2013. The  
762 transcription factor Otx2 regulates choroid plexus development and function. *Development*  
763 **140**: 1055-1066.
- 764 Kajimura S, Seale P, Tomaru T, Erdjument-Bromage H, Cooper MP, Ruas JL, Chin S,  
765 Tempst P, Lazar MA, Spiegelman BM. 2008. Regulation of the brown and white fat gene  
766 programs through a PRDM16/CtBP transcriptional complex. *Genes Dev* **22**: 1397-1409.
- 767 Kriegstein A, Alvarez-Buylla A. 2009. The glial nature of embryonic and adult neural stem  
768 cells. *Annu Rev Neurosci* **32**: 149-184.
- 769 Kwan KY, Sestan N, Anton ES. 2012. Transcriptional co-regulation of neuronal migration  
770 and laminar identity in the neocortex. *Development* **139**: 1535-1546.
- 771 Lehtinen MK, Bjornsson CS, Dymecki SM, Gilbertson RJ, Holtzman DM, Monuki ES. 2013.  
772 The choroid plexus and cerebrospinal fluid: emerging roles in development, disease, and  
773 therapy. *J Neurosci* **33**: 17553-17559.
- 774 Lehtinen MK, Zappaterra MW, Chen X, Yang YJ, Hill AD, Lun M, Maynard T, Gonzalez D,  
775 Kim S, Ye P et al. 2011. The cerebrospinal fluid provides a proliferative niche for neural  
776 progenitor cells. *Neuron* **69**: 893-905.
- 777 Love MI, Huber W, Anders S. 2014. Moderated estimation of fold change and dispersion for  
778 RNA-seq data with DESeq2. *Genome Biol* **15**: 550.

- 779 Lun AT, McCarthy DJ, Marioni JC. 2016. A step-by-step workflow for low-level analysis of  
780 single-cell RNA-seq data with Bioconductor. *F1000Res* **5**: 2122.
- 781 Mairret-Coello G, Tury A, Van Buskirk E, Robinson K, Genestine M, DiCicco-Bloom E.  
782 2012. p57(KIP2) regulates radial glia and intermediate precursor cell cycle dynamics and  
783 lower layer neurogenesis in developing cerebral cortex. *Development* **139**: 475-487.
- 784 McConnell SK, Kaznowski CE. 1991. Cell cycle dependence of laminar determination in  
785 developing neocortex. *Science* **254**: 282-285.
- 786 McEvelly RJ, de Diaz MO, Schonemann MD, Hooshmand F, Rosenfeld MG. 2002.  
787 Transcriptional regulation of cortical neuron migration by POU domain factors. *Science* **295**:  
788 1528-1532.
- 789 McKenna WL, Ortiz-Londono CF, Mathew TK, Hoang K, Katzman S, Chen B. 2015. Mutual  
790 regulation between *Satb2* and *Fezf2* promotes subcerebral projection neuron identity in the  
791 developing cerebral cortex. *Proc Natl Acad Sci U S A* **112**: 11702-11707.
- 792 Molyneaux BJ, Arlotta P, Hirata T, Hibi M, Macklis JD. 2005. *Fez1* is required for the birth  
793 and specification of corticospinal motor neurons. *Neuron* **47**: 817-831.
- 794 Molyneaux BJ, Arlotta P, Menezes JR, Macklis JD. 2007. Neuronal subtype specification in  
795 the cerebral cortex. *Nat Rev Neurosci* **8**: 427-437.
- 796 Nishikata I, Sasaki H, Iga M, Tateno Y, Imayoshi S, Asou N, Nakamura T, Morishita K.  
797 2003. A novel EVI1 gene family, MEL1, lacking a PR domain (MEL1S) is expressed mainly  
798 in t(1;3)(p36;q21)-positive AML and blocks G-CSF-induced myeloid differentiation. *Blood*  
799 **102**: 3323-3332.
- 800 Noctor SC, Martinez-Cerdeno V, Ivic L, Kriegstein AR. 2004. Cortical neurons arise in  
801 symmetric and asymmetric division zones and migrate through specific phases. *Nat Neurosci*  
802 **7**: 136-144.
- 803 Okano H, Temple S. 2009. Cell types to order: temporal specification of CNS stem cells.  
804 *Curr Opin Neurobiol* **19**: 112-119.
- 805 Pinheiro I, Margueron R, Shukeir N, Eisold M, Fritzsche C, Richter FM, Mittler G, Genoud C,  
806 Goyama S, Kurokawa M et al. 2012. *Prdm3* and *Prdm16* are H3K9me1 methyltransferases  
807 required for mammalian heterochromatin integrity. *Cell* **150**: 948-960.
- 808 Ritchie ME, Phipson B, Wu D, Hu Y, Law CW, Shi W, Smyth GK. 2015. *limma* powers  
809 differential expression analyses for RNA-sequencing and microarray studies. *Nucleic Acids*  
810 *Res* **43**: e47.
- 811 Shen Q, Wang Y, Dimos JT, Fasano CA, Phoenix TN, Lemischka IR, Ivanova NB, Stifani S,  
812 Morrissey EE, Temple S. 2006. The timing of cortical neurogenesis is encoded within lineages  
813 of individual progenitor cells. *Nature neuroscience* **9**: 743-751.
- 814 Shim S, Kwan KY, Li M, Lefebvre V, Sestan N. 2012. Cis-regulatory control of corticospinal  
815 system development and evolution. *Nature* **486**: 74-79.
- 816 Shimada IS, Acar M, Burgess RJ, Zhao Z, Morrison SJ. 2017. *Prdm16* is required for the  
817 maintenance of neural stem cells in the postnatal forebrain and their differentiation into  
818 ependymal cells. *Genes Dev* **31**: 1134-1146.
- 819 Srinivasan K, Leone DP, Bateson RK, Dobrev G, Kohwi Y, Kohwi-Shigematsu T,  
820 Grosschedl R, McConnell SK. 2012. A network of genetic repression and derepression  
821 specifies projection fates in the developing neocortex. *Proc Natl Acad Sci U S A* **109**: 19071-  
822 19078.
- 823 Strassman A, Schnutgen F, Dai Q, Jones JC, Gomez AC, Pitstick L, Holton NE, Moskal R,  
824 Leslie ER, von Melchner H et al. 2017. Generation of a multipurpose *Prdm16* mouse allele by  
825 targeted gene trapping. *Dis Model Mech* **10**: 909-922.
- 826 Sugitani Y, Nakai S, Minowa O, Nishi M, Jishage K, Kawano H, Mori K, Ogawa M, Noda T.  
827 2002. *Brn-1* and *Brn-2* share crucial roles in the production and positioning of mouse  
828 neocortical neurons. *Genes Dev* **16**: 1760-1765.

829 Vandenberg RJ, Ryan RM. 2013. Mechanisms of glutamate transport. *Physiol Rev* **93**: 1621-  
830 1657.

831 Vitali I, Fievre S, Telley L, Oberst P, Bariselli S, Frangeul L, Baumann N, McMahon JJ,  
832 Klingler E, Bocchi R et al. 2018. Progenitor Hyperpolarization Regulates the Sequential  
833 Generation of Neuronal Subtypes in the Developing Neocortex. *Cell* **174**: 1264-1276 e1215.

834 Yamagishi S, Hampel F, Hata K, Del Toro D, Schwark M, Kvachnina E, Bastmeyer M,  
835 Yamashita T, Tarabykin V, Klein R et al. 2011. FLRT2 and FLRT3 act as repulsive guidance  
836 cues for Unc5-positive neurons. *The EMBO journal* **30**: 2920-2933.

837 Yoon KJ, Ringeling FR, Vissers C, Jacob F, Pokrass M, Jimenez-Cyrus D, Su Y, Kim NS,  
838 Zhu Y, Zheng L et al. 2017. Temporal Control of Mammalian Cortical Neurogenesis by  
839 m(6)A Methylation. *Cell* **171**: 877-889 e817.

840 Yuzwa SA, Borrett MJ, Innes BT, Voronova A, Ketela T, Kaplan DR, Bader GD, Miller FD.  
841 2017. Developmental Emergence of Adult Neural Stem Cells as Revealed by Single-Cell  
842 Transcriptional Profiling. *Cell Rep* **21**: 3970-3986.

843 Zahr SK, Yang G, Kazan H, Borrett MJ, Yuzwa SA, Voronova A, Kaplan DR, Miller FD.  
844 2018. A Translational Repression Complex in Developing Mammalian Neural Stem Cells that  
845 Regulates Neuronal Specification. *Neuron* **97**: 520-537 e526.

846 Zhou B, Wang J, Lee SY, Xiong J, Bhanu N, Guo Q, Ma P, Sun Y, Rao RC, Garcia BA et al.  
847 2016. PRDM16 Suppresses MLL1r Leukemia via Intrinsic Histone Methyltransferase  
848 Activity. *Mol Cell* **62**: 222-236.

849

850

851

852



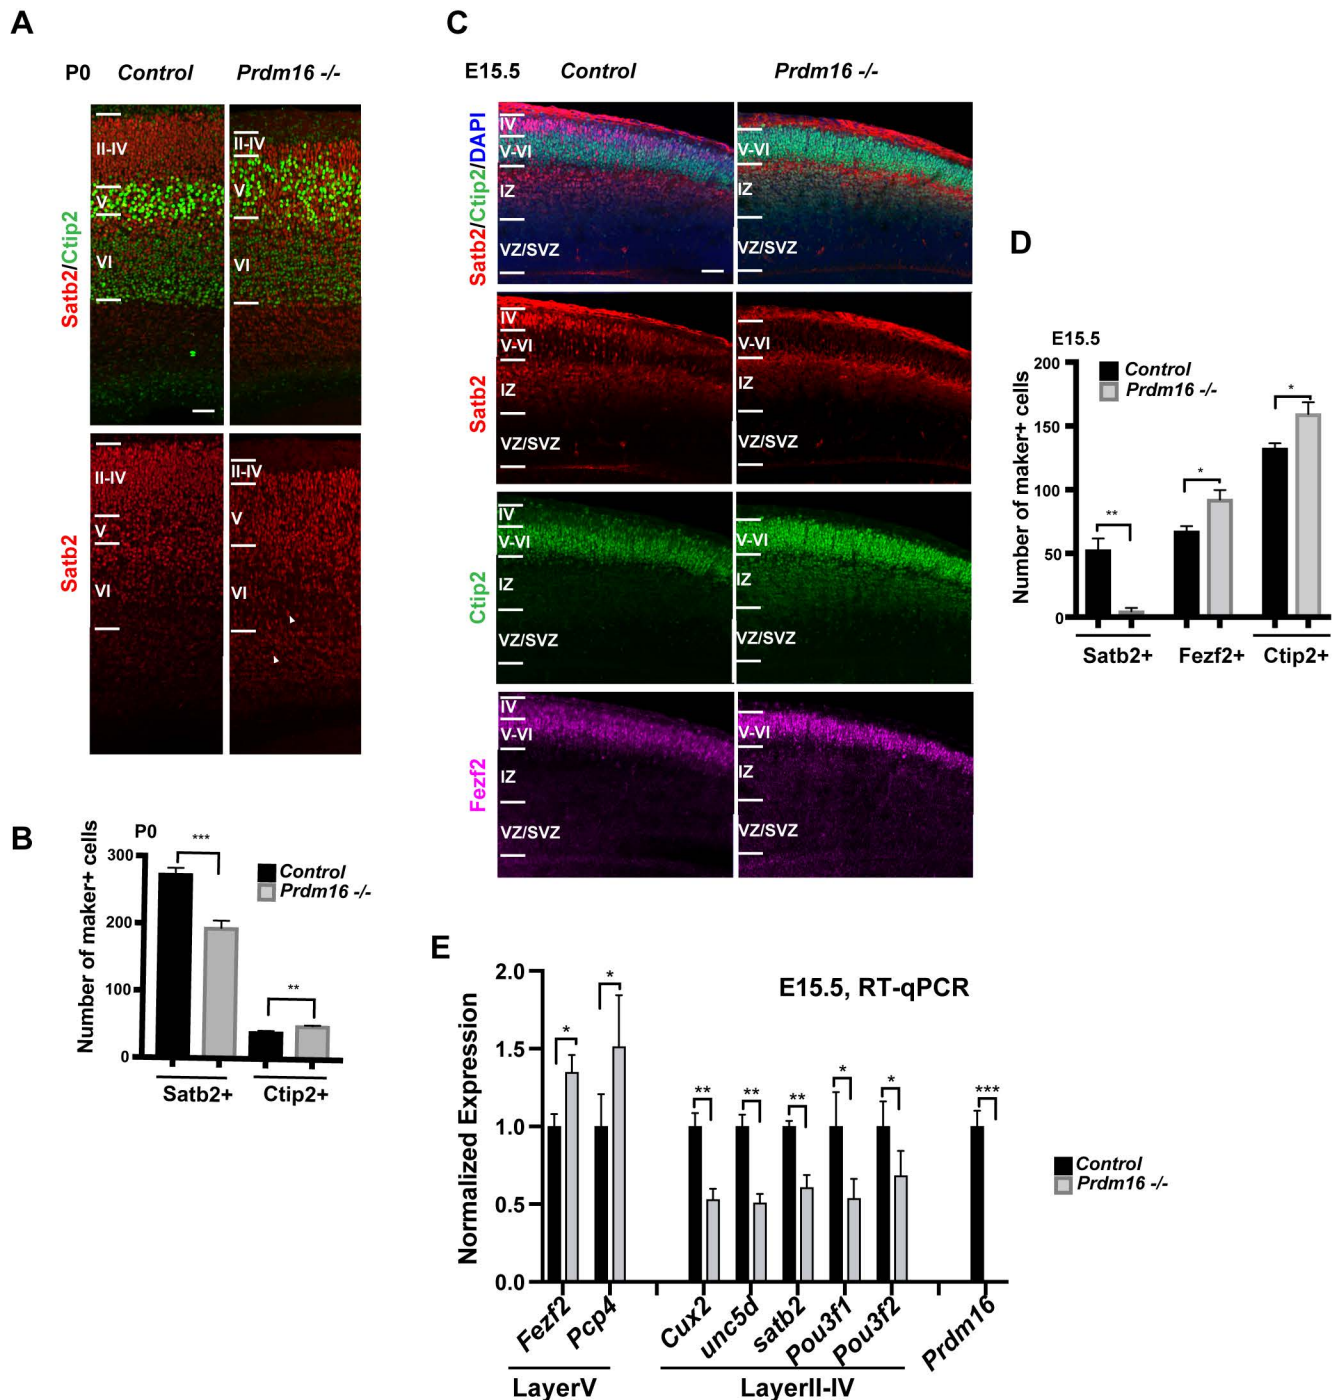

Figure 1. PRDM16 regulates cortical laminar organization

(A) Images of P0 cortices show increased Ctip2<sup>+</sup> mid-layer and reduced Satb2<sup>+</sup> upper-layer. White arrow heads indicate retained Satb2<sup>+</sup> in the lower layers. Cortical layers are highlighted according to relative distribution of Satb2<sup>+</sup> and Ctip2<sup>+</sup> cells. (B) Quantification of the marker<sup>+</sup> cells in (A) in 80  $\mu$ m column across the P0 cortex (n=3). (C) Images of E15.5 cortices show reduction of the Satb2<sup>+</sup> layer and expansion of the Ctip2<sup>+</sup> or Fezf2<sup>+</sup> layer. (D) Quantification of the marker<sup>+</sup> cells in (C) in 100  $\mu$ m column across the cortex of E15.5 (n=3). (E) Measurement of layer marker genes by RT-qPCR from E15.5 control and Prdm16 KO cortices. All data are shown as mean  $\pm$  SD; \*p<0.05; \*\*p<0.01; \*\*\*p<0.001. Scale bar: 50  $\mu$ m.

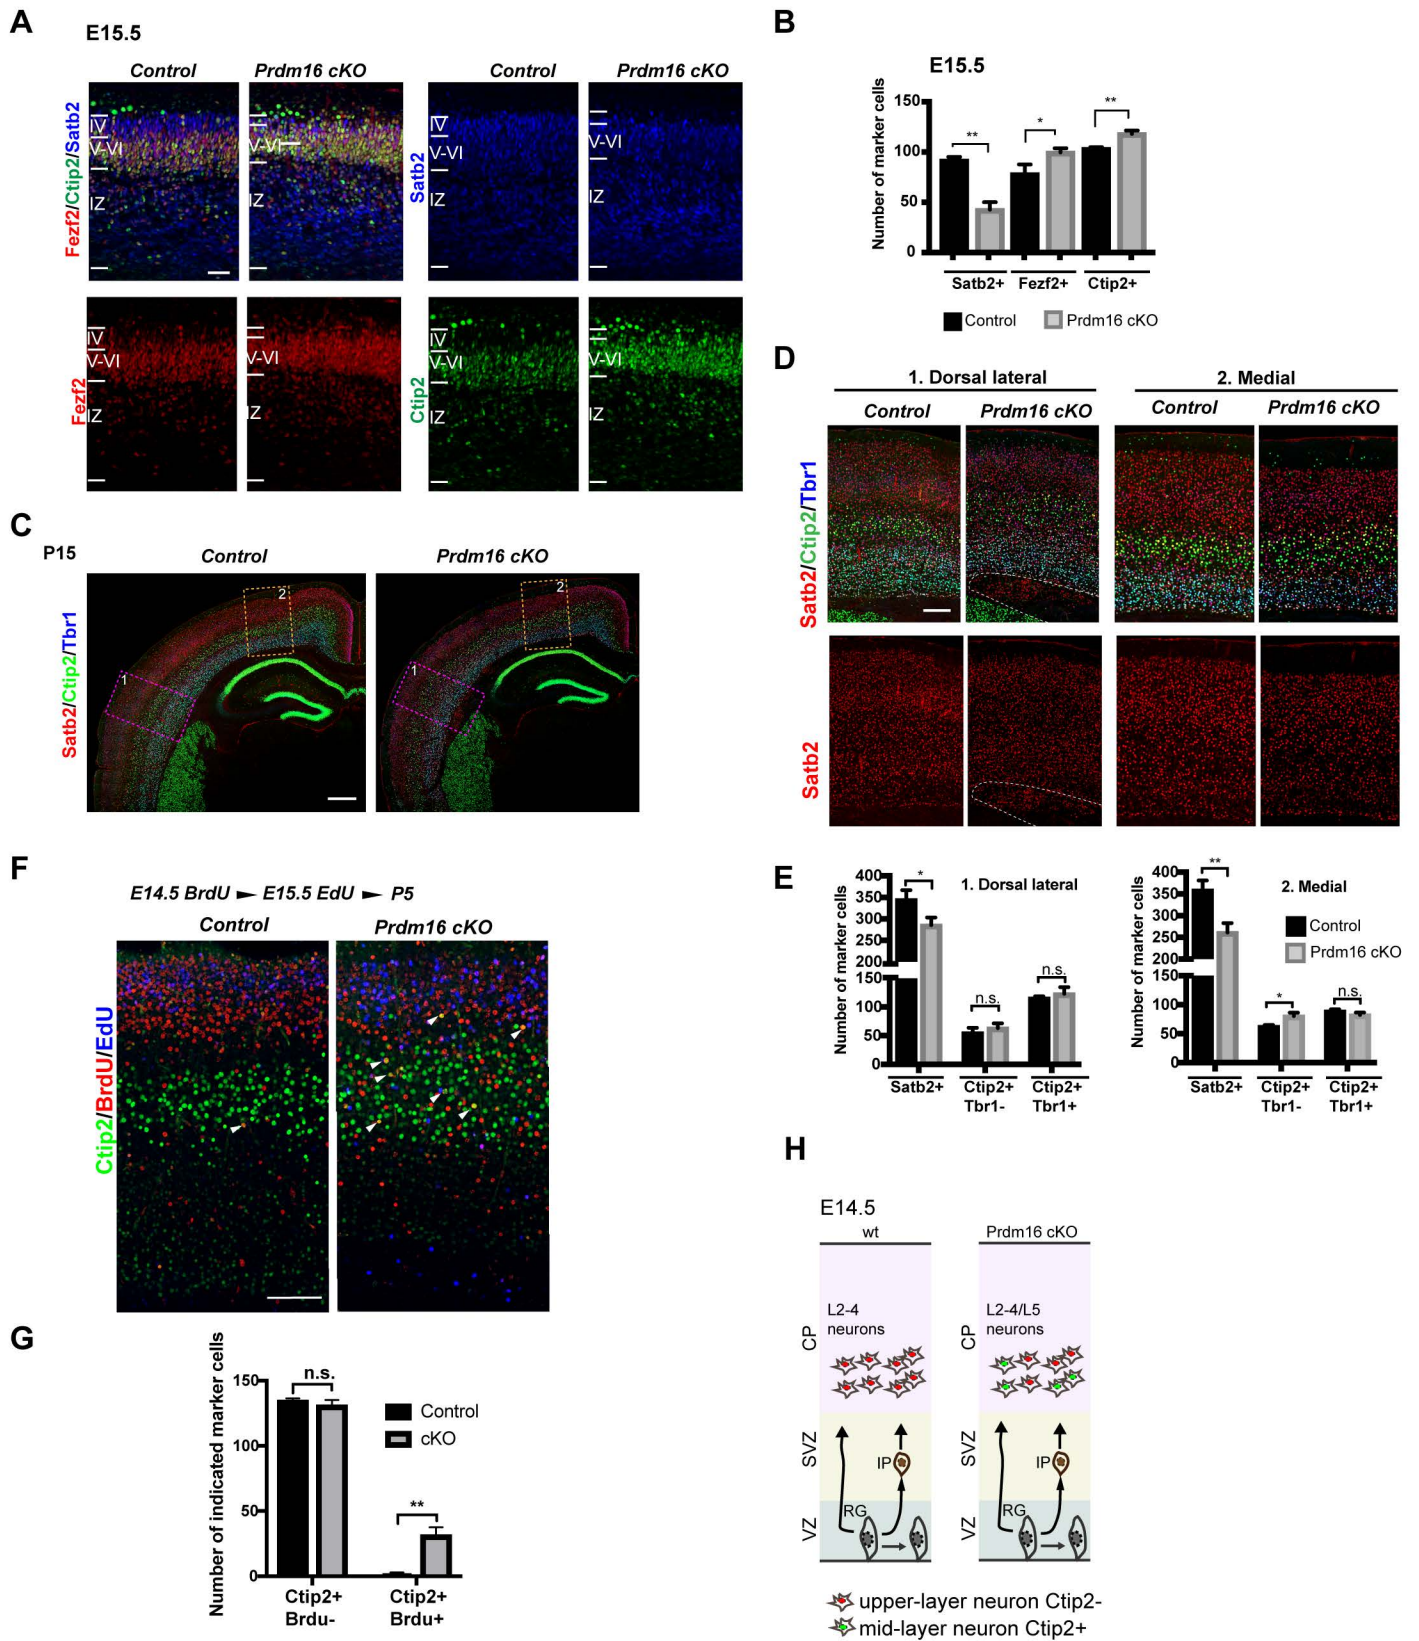

*Figure 2. Forebrain-specific depletion of Prdm16 delayed mid-to-late neurogenesis transition*

**(A)** Images of E15.5 control and *Emx1-Cre::Prdm16* cKO cortices show reduction of the *Satb2*<sup>+</sup> layer and expansion of the *Ctip2*<sup>+</sup> or *Fezf2*<sup>+</sup> layer. Scale bar: 50  $\mu$ m. **(B)** Quantification of the marker<sup>+</sup> cells in 100  $\mu$ m column across the cortex (n=3). **(C)** Images of P15 control and *Prdm16* cKO cortices stained with *Satb2*, *Ctip2* and *Tbr1*. Dorsal lateral and medial areas are highlighted in pink and orange rectangles respectively. Scale bar: 100  $\mu$ m. **(D)** Higher magnification images from C show reciprocal effects on *Ctip2*<sup>+</sup> and *Satb2*<sup>+</sup> layers in cKO cortices and the heterotopia tissue highlighted by white dashed line in the Dorsal lateral region. Scale bar: 50  $\mu$ m. **(E)** Quantification of the numbers of three cell types in 300  $\mu$ m column in each area (n=3). **(F)** Images of the P5 control and *Prdm16* cKO cortices, stained with *Ctip2*, *BrdU* and *EdU*. White arrowheads point to *BrdU*<sup>+</sup>*Ctip2*<sup>+</sup> cells. Scale bar: 100  $\mu$ m. **(G)** Quantification of the numbers of the *Ctip2*<sup>+</sup>*BrdU*<sup>-</sup> and *Ctip2*<sup>+</sup>*BrdU*<sup>+</sup> cells in 300  $\mu$ m width across the cortex (n=3). All data are shown as mean  $\pm$  SD; \**p*<0.05; \*\**p*<0.01; \*\*\**p*<0.001. **(H)** Illustration of the progression delay: mutant RG produce *Ctip2*<sup>+</sup> neurons at E14.5.

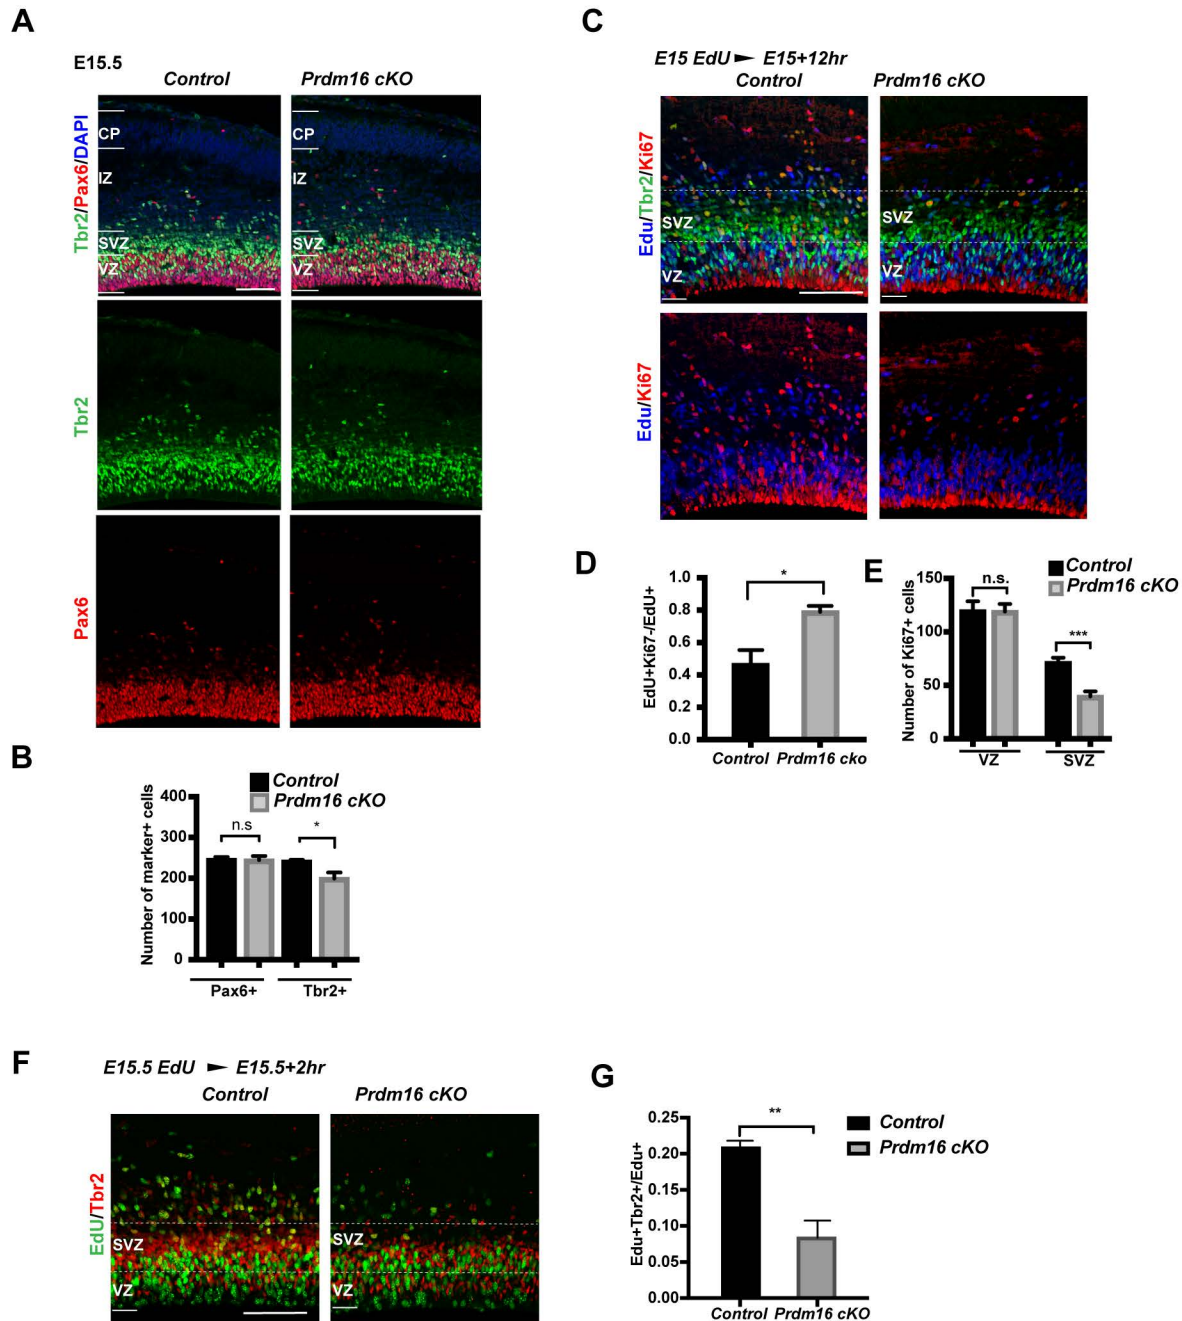

Figure 3. PRDM16 promotes IP cell proliferation during late cortical neurogenesis

(A) Images of E15.5 control and Prdm16 cKO cortices, stained with the IP marker Tbr2, the RG marker Pax6 and DAPI. (B) Quantification of the marker+ cells in 200  $\mu$ m width column across the cortex ( $n=3$ ). (C) Images of E15.5 control and Prdm16 cKO cortices, stained with EdU, Tbr2 and Ki67. White dashed lines highlight the SVZ. Scale bar: 50  $\mu$ m. (D) Quantification of the fraction of EdU+Ki67- cells in 200  $\mu$ m over EdU+ cells ( $n=3$ ). (E) Quantification of Ki67+ cells in 300  $\mu$ m ( $n=3$ ). (F) Images of E15.5 with a 2-hour EdU pulse labeling, stained with EdU and Tbr2 antibodies. (G) Quantification of the fraction of EdU+Tbr2+ over EdU+ cells. Scale bar: 50  $\mu$ m. All data are shown as mean  $\pm$  SD; \* $p<0.05$ ; \*\* $p<0.01$ ; \*\*\* $p<0.001$ .

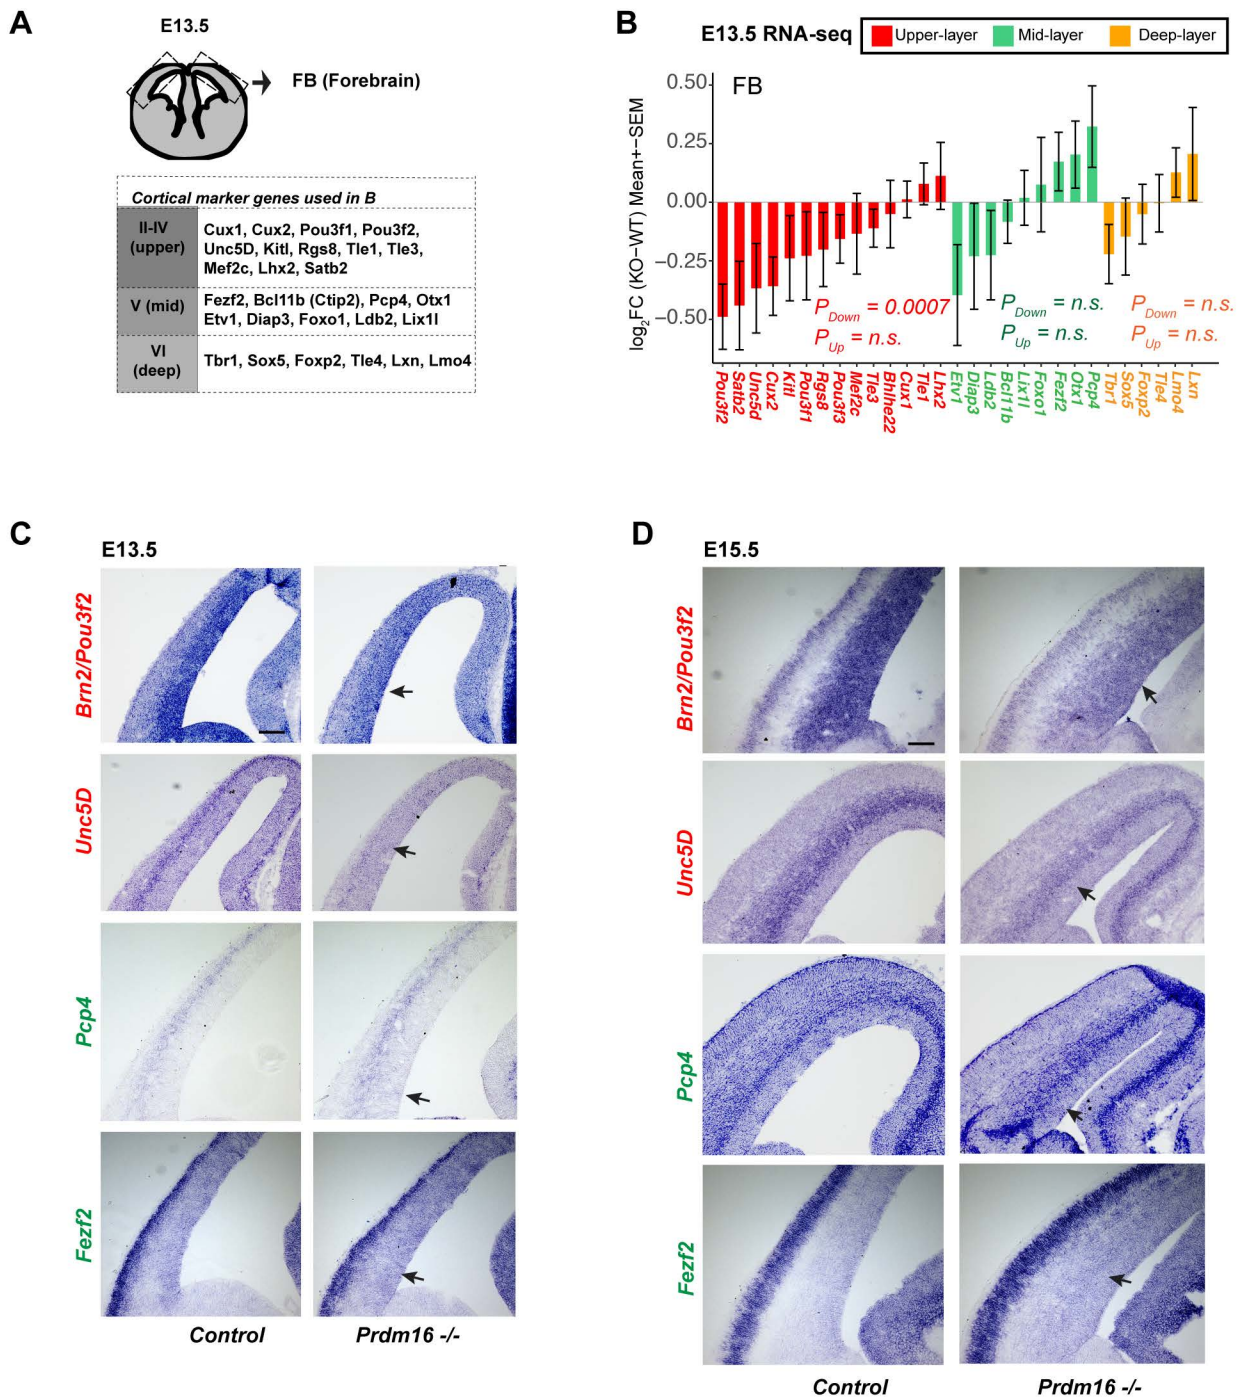

Figure 4. Depletion of Prdm16 led to defective gene expression in the developing cortex

(A) Schematic of the RNA-seq tissue and a list of layer marker genes described in the study. (B) Fold-changes of upper-, mid-, and deep-layer genes are shown. A gene set test shows the upper layer markers are significantly down-regulated. (C-D) In situ hybridization for Pou3f2/Brn2, Unc5D, Pcp4 and Fezf2 on control and mutant cortices at E13.5 and E15.5. Black arrows indicate Scale bar: 100  $\mu$ m.

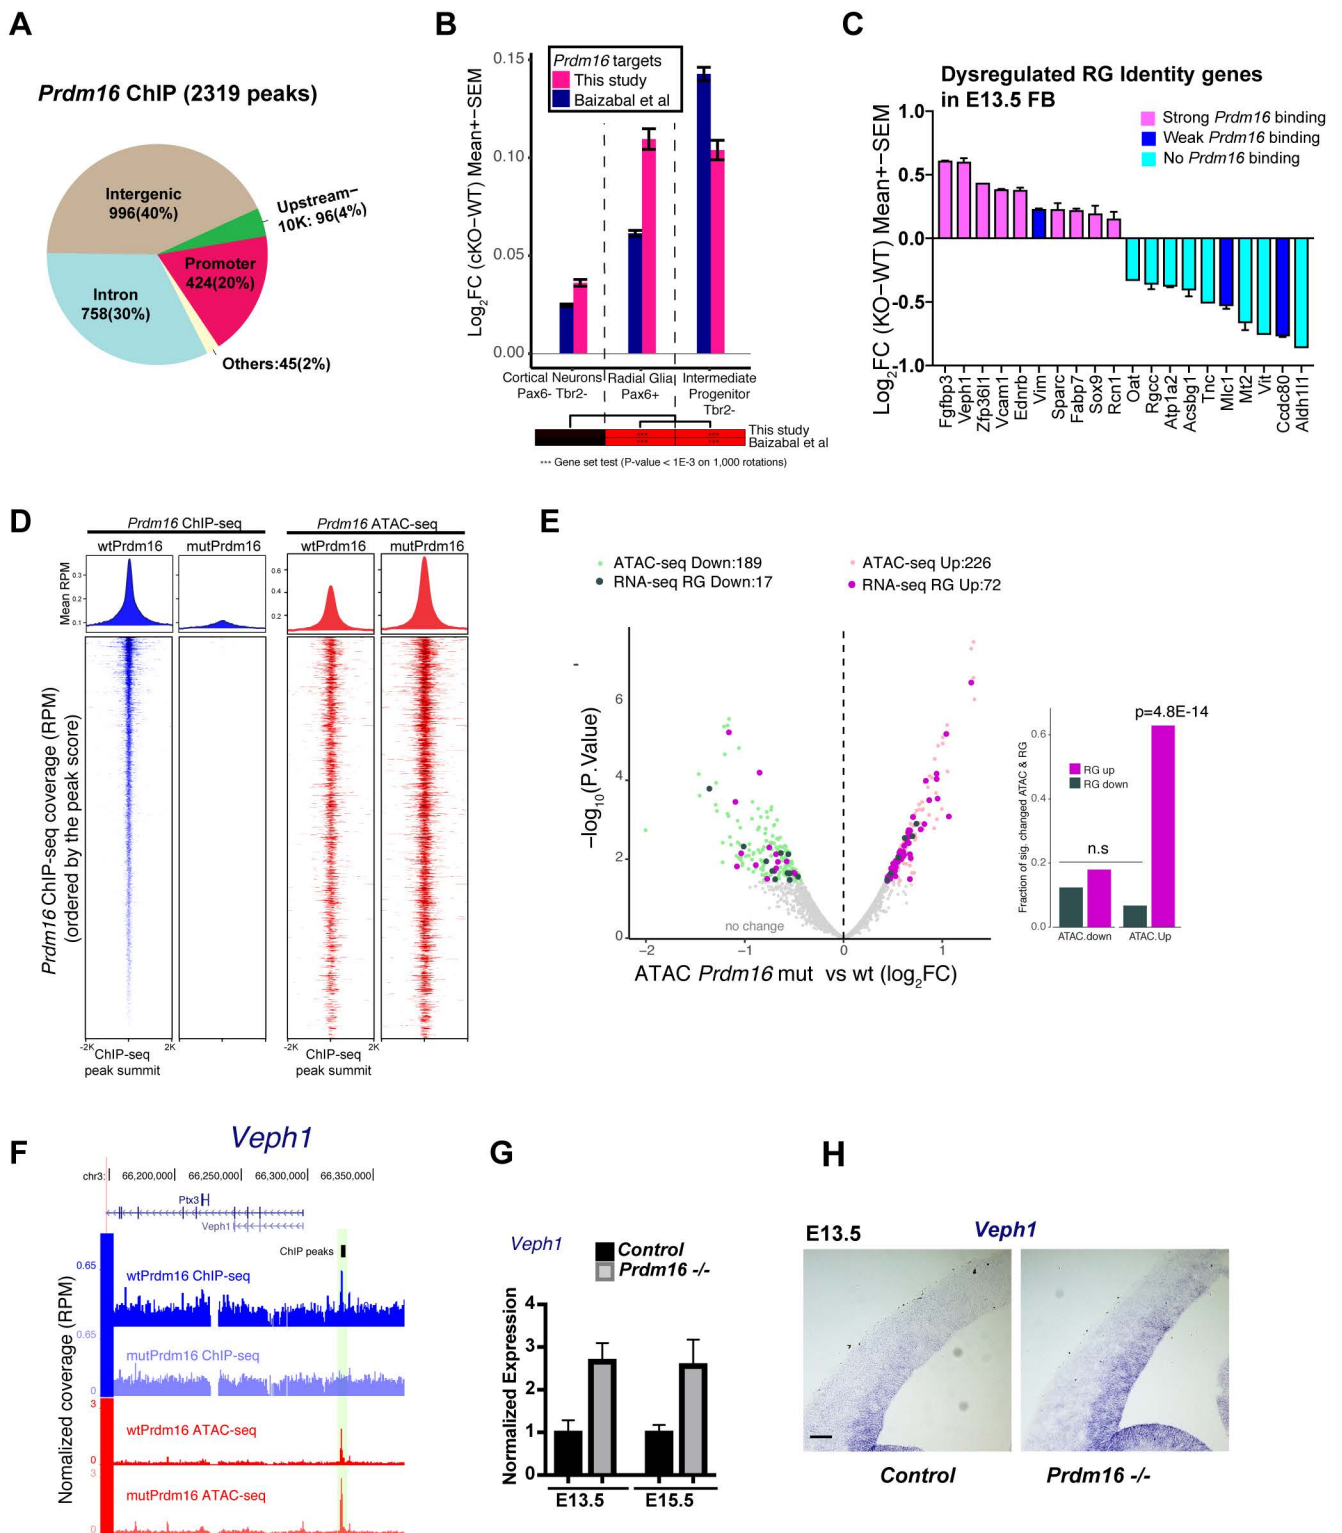

*Figure 5. PRDM16 represses its target gene expression*

**(A)** Genomic distribution of PRDM16 ChIP-seq peaks. **(B)** Gene set testing shows PRDM16 targets with a trend of up-regulation in cKO vs control in RG and IP, but not in CN. **(C)** A subset of the RG identity genes bound by PRDM16 show up-regulation in *Prdm16* mutant FB while those weakly or not bound by *Prdm16* were down-regulated. **(D)** The volcano plot shows significantly increased (light pink) or decreased (light green) ATAC-seq signal in mutant vs control at PRDM16-bound loci ( $FDR \leq 0.2$ ). The associated genes that had expression change in mutant RG were indicated in purple (up-regulated) or dark-green (down-regulated). The bar plot on the right side shows the fraction of genes that changed expression in mutant RG over all the genes that changed ATAC signals on the *Prdm16*-bound peaks. Gene up-regulation correlates with increased ATAC-seq signal. **(E)** Screenshot of the *Veph1* gene locus, an example of bound and upregulated genes with increased chromatin accessibility. **(F-G)** RT-qPCR and *in situ* hybridization confirms de-repression of *Veph1* in E13.5 and E15.5 KO FB.

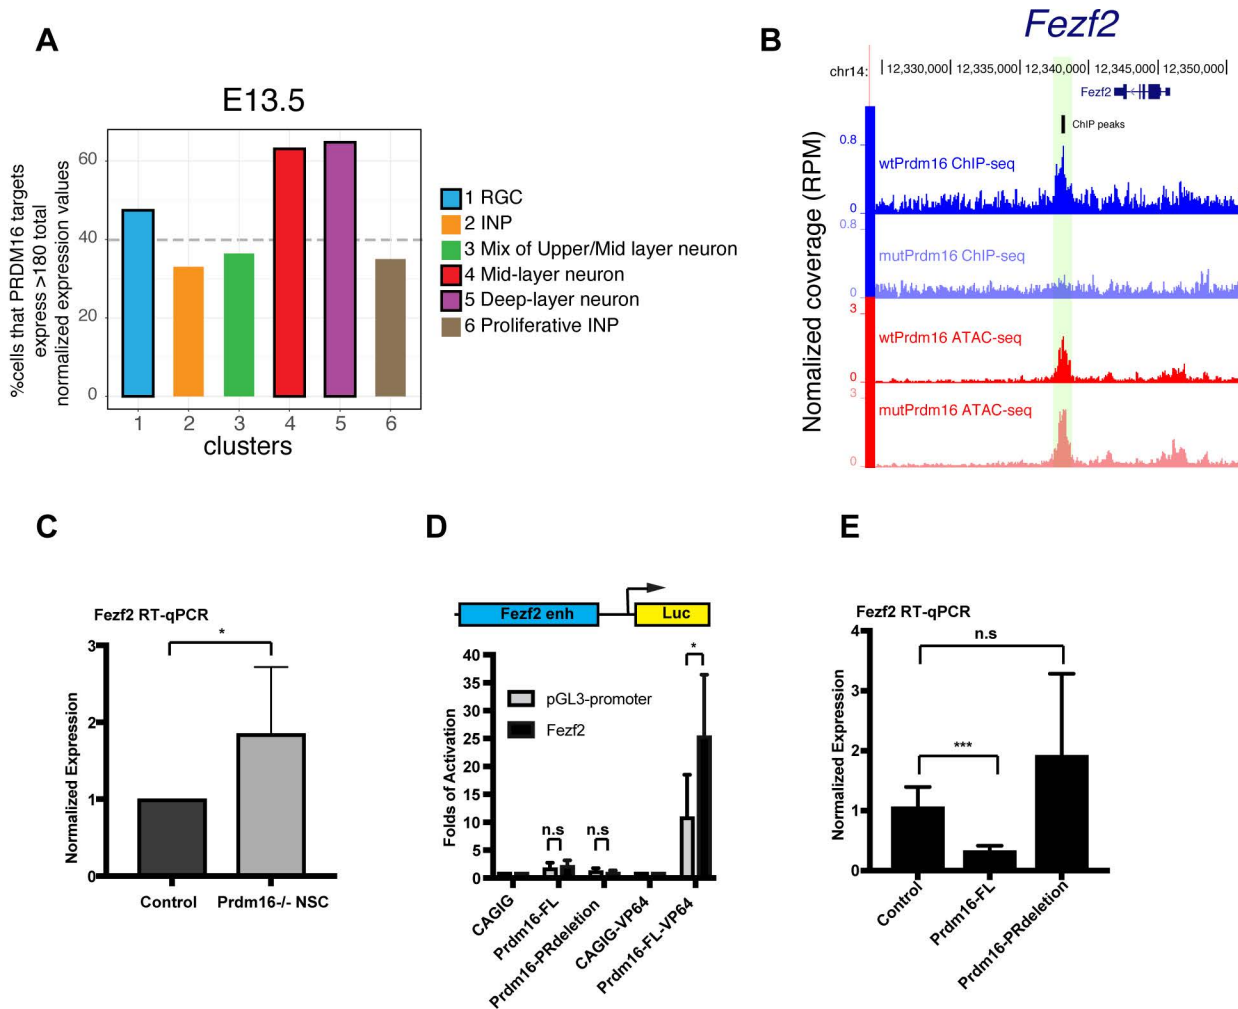

Figure 6. PRDM16 represses mid-layer neuronal genes including *Fezf2*.

(A) Re-analysis of the cortex scRNA-seq data (Yuzwa et al. 2017) shows *Prdm16* targets enriched in the RG, mid- and deep-layer neuron clusters at E13.5. The Y-axis plots the percentage of cells that have summed expression of PRDM16 targets per cell ( $\log_2$ counts, normalized by library size, only the cells that have >180 expression value after normalization are included). (B) Screenshot of the *Fezf2* locus with a PRDM16 peak in the RG enhancer of *Fezf2*. (C) RT-qPCR from primary neural stem cell culture of control and *Prdm16* mutant cortical cells. Three pairs of control and *Prdm16* KO embryos were used. (D) Luciferase assays in N2A cells. *Prdm16*-FL-VP64 significantly induced expression of the *Fezf2* reporter but not the empty pGL3-luc alone. Four biological replicates were used. (E) RT-qPCR from the N2A cells expressing pCDH-Puro (empty vector control), *Prdm16*-FL or *Prdm16*-PRdeletion constructs. Two independent stable lines for each construct and three technique replicates of each stable line were used. All data are shown as mean  $\pm$  SD; \* $p < 0.05$ ; \*\* $p < 0.01$ ; \*\*\* $p < 0.001$ ; n.s., not significant.



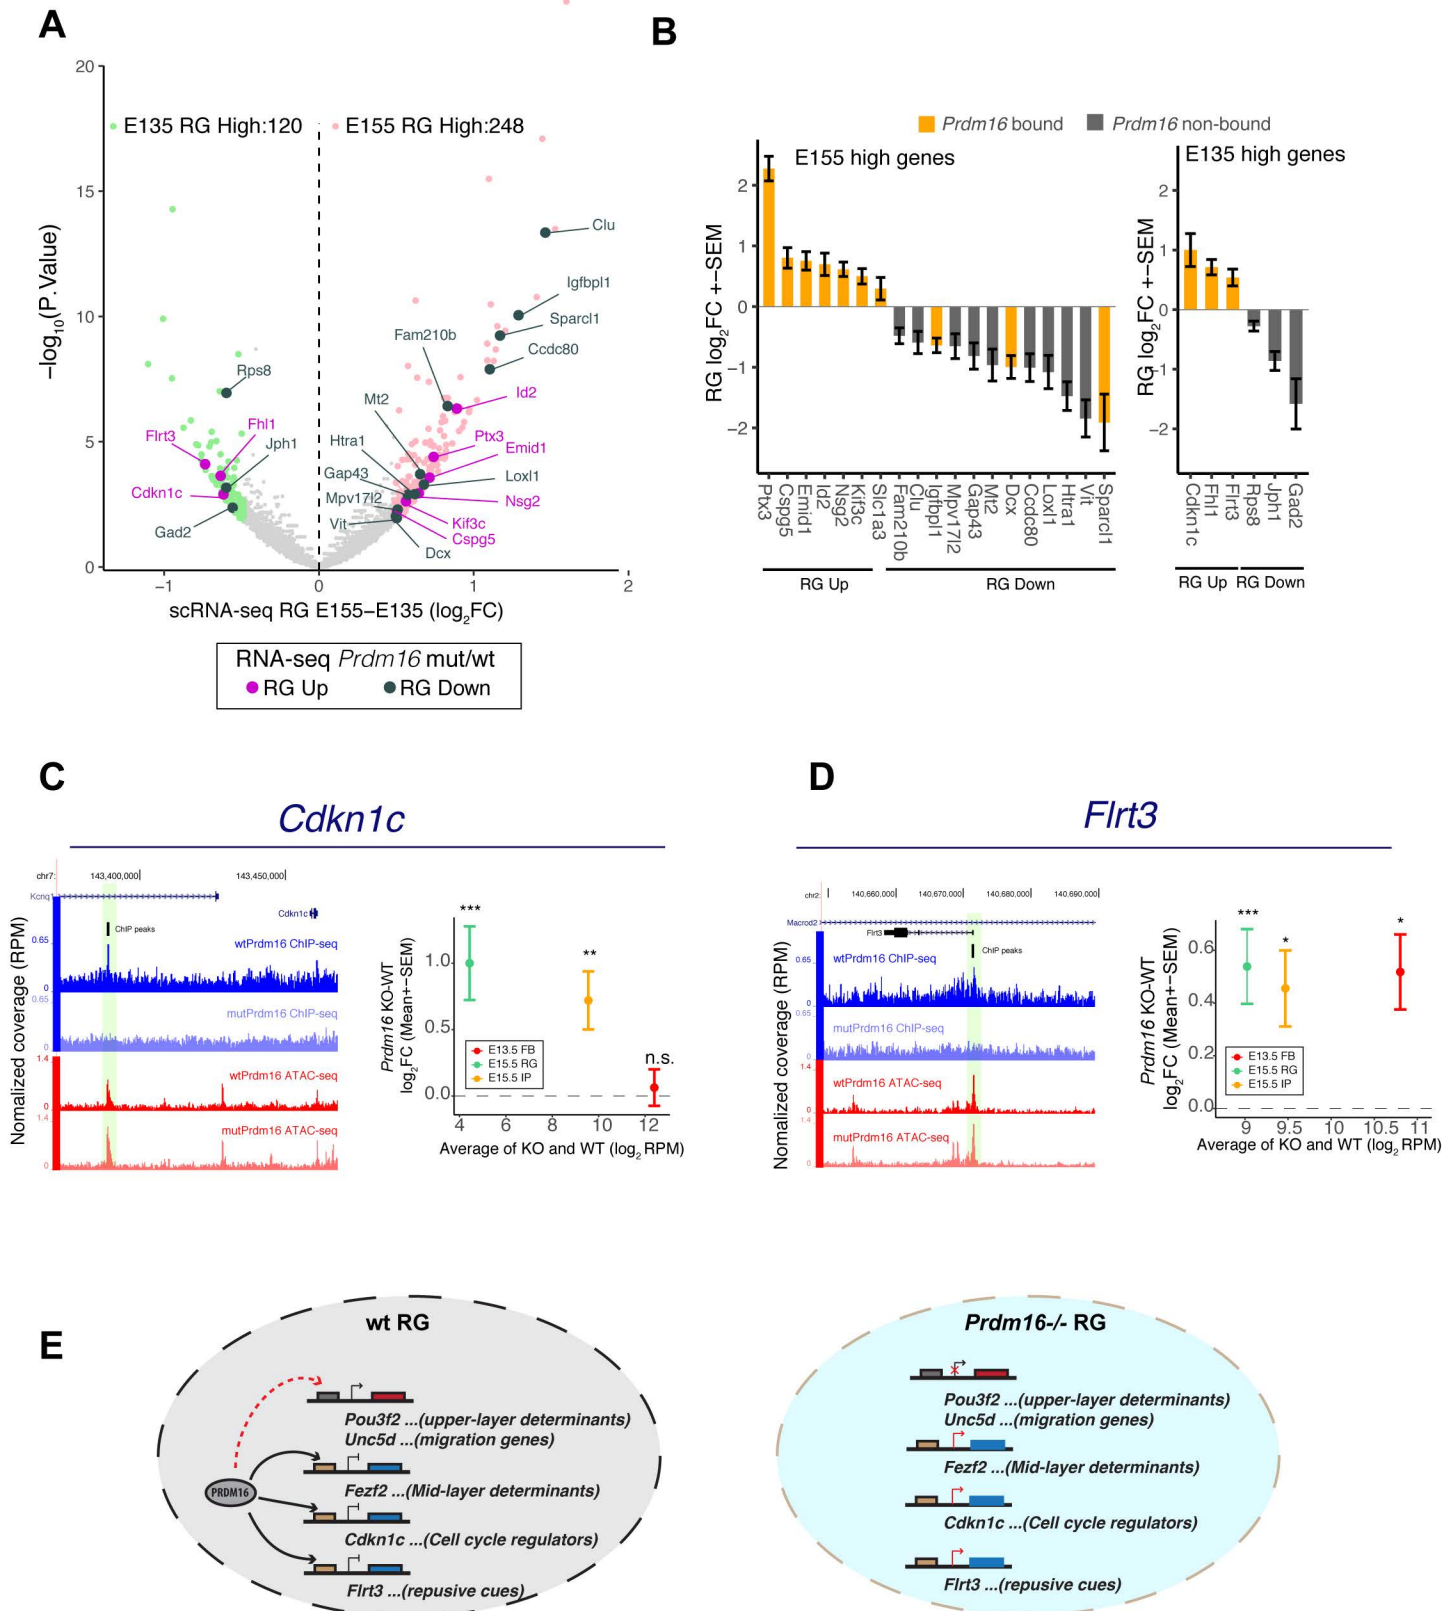

*Figure 7. PRDM16 regulates temporal dynamics of RG gene expression*

**(A)** Differentially expressed genes ( $FDR < 0.2$  and  $FC > 1.4$ -fold) between E15.5 and E13.5 RG in the volcano plot include 248 increased (light pink) and 120 decreased (light green) genes in E15.5 versus E13.5 RG. The 24 most significantly up- and down-regulated genes were highlighted in purple and dark-green respectively in *Prdm16* cKO/WT RG ( $FDR < 0.05$ ). **(B)** Expression changes of the 24 genes in *Prdm16* cKO/WT RG were plotted. The genes containing PRDM16 binding peaks are highlighted in orange. **(C-D)** Screenshots and expression changes of two E13.5 high genes, *Cdkn1c* (C) and *Flrt3* (D). Average RPM of KO and WT on x-axis shows absolute expression level. y-axis plots the fold-changes between KO/WT. \* $FDR < 0.1$ ; \*\* $FDR < 0.05$ ; \*\*\*  $FDR < 0.01$ . **(E)** Proposed model of how PRDM16 controls RG neurogenesis through regulating different classes of genes. In *Prdm16* mutant RG, de-repression of genes encoding mid-layer determinants, stage-specific cell-cycle regulators and migration cues consequently leads to prolonged production of mid-layer neurons, reduced IP proliferation and compromised neuronal production and migration for upper-layer neurons.
